# Supplementary material for: Burnout and coping strategies among nurses in Malaysia: a national-level cross-sectional study
Source: PubMed Central journal article supplement — BMJ Open. 2022 Oct 10;12(10):e064687. doi: 10.1136/bmjopen-2022-064687 (PMC9557773; doi:10.1136/bmjopen-2022-064687), 2022-10-10
Supplement: bmjopen-2022-064687.draft_revisions.pdf [file bmjopen-2022-064687.draft_revisions.pdf]

# BMJ Open

BMJ Open is committed to open peer review. As part of this commitment we make the peer review history of every article we publish publicly available.

When an article is published we post the peer reviewers' comments and the authors' responses online. We also post the versions of the paper that were used during peer review. These are the versions that the peer review comments apply to.

The versions of the paper that follow are the versions that were submitted during the peer review process. They are not the versions of record or the final published versions. They should not be cited or distributed as the published version of this manuscript.

BMJ Open is an open access journal and the full, final, typeset and author-corrected version of record of the manuscript is available on our site with no access controls, subscription charges or pay-per-view fees (<http://bmjopen.bmj.com>).

If you have any questions on BMJ Open's open peer review process please email [info.bmjopen@bmj.com](mailto:info.bmjopen@bmj.com)

# BMJ Open

## Burnout and Coping Strategies among Nurses in Malaysia: A National-level Cross-sectional Study

|                               |                                                                                                                                                                                                                                                                                                                                                                                                                                                                                 |
|-------------------------------|---------------------------------------------------------------------------------------------------------------------------------------------------------------------------------------------------------------------------------------------------------------------------------------------------------------------------------------------------------------------------------------------------------------------------------------------------------------------------------|
| Journal:                      | <i>BMJ Open</i>                                                                                                                                                                                                                                                                                                                                                                                                                                                                 |
| Manuscript ID                 | bmjopen-2022-064687                                                                                                                                                                                                                                                                                                                                                                                                                                                             |
| Article Type:                 | Original research                                                                                                                                                                                                                                                                                                                                                                                                                                                               |
| Date Submitted by the Author: | 11-May-2022                                                                                                                                                                                                                                                                                                                                                                                                                                                                     |
| Complete List of Authors:     | Binti Zakaria, Nursyahda; Ministry of Health Malaysia, Institute for Health Management, National Institutes of Health<br>Binti Zakaria, Nor Haniza; Ministry of Health Malaysia, Institute for Health Management, National Institutes of Health<br>Bin Abdul Rassip, Muhammad Nur Amir; Institute for Health Management, Centre of Clinical Governance Development<br>Lee, Kun Yun; Ministry of Health Malaysia, Institute for Health Management, National Institutes of Health |
| Keywords:                     | MENTAL HEALTH, Human resource management < HEALTH SERVICES ADMINISTRATION & MANAGEMENT, PUBLIC HEALTH, PRIMARY CARE                                                                                                                                                                                                                                                                                                                                                             |
|                               |                                                                                                                                                                                                                                                                                                                                                                                                                                                                                 |

SCHOLARONE™  
Manuscripts

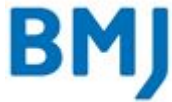

I, the Submitting Author has the right to grant and does grant on behalf of all authors of the Work (as defined in the below author licence), an exclusive licence and/or a non-exclusive licence for contributions from authors who are: i) UK Crown employees; ii) where BMJ has agreed a CC-BY licence shall apply, and/or iii) in accordance with the terms applicable for US Federal Government officers or employees acting as part of their official duties; on a worldwide, perpetual, irrevocable, royalty-free basis to BMJ Publishing Group Ltd ("BMJ") its licensees and where the relevant Journal is co-owned by BMJ to the co-owners of the Journal, to publish the Work in this journal and any other BMJ products and to exploit all rights, as set out in our [licence](#).

The Submitting Author accepts and understands that any supply made under these terms is made by BMJ to the Submitting Author unless you are acting as an employee on behalf of your employer or a postgraduate student of an affiliated institution which is paying any applicable article publishing charge ("APC") for Open Access articles. Where the Submitting Author wishes to make the Work available on an Open Access basis (and intends to pay the relevant APC), the terms of reuse of such Open Access shall be governed by a Creative Commons licence – details of these licences and which [Creative Commons](#) licence will apply to this Work are set out in our licence referred to above.

Other than as permitted in any relevant BMJ Author's Self Archiving Policies, I confirm this Work has not been accepted for publication elsewhere, is not being considered for publication elsewhere and does not duplicate material already published. I confirm all authors consent to publication of this Work and authorise the granting of this licence.

1  
2  
3 1 **Burnout and Coping Strategies among Nurses in Malaysia: A National-level Cross-**  
4 **sectional Study**  
5 2  
6 3

7  
8 4 Nursyahda Z<sup>1</sup>, Nor Haniza Z<sup>1</sup>, Muhammad Nur Amir AR<sup>1</sup>, Lee KY<sup>1</sup>  
9 5

10  
11 6 <sup>1</sup>Institute for Health Management, National Institutes of Health, Ministry of Health Malaysia  
12 7  
13 8  
14 9  
15 10  
16 11  
17 12  
18 13  
19 14  
20 15  
21 16  
22 17  
23 18  
24 19  
25 20  
26 21  
27 22  
28 23  
29 24  
30 25  
31 26  
32 27  
33 28  
34 29  
35 30  
36 31  
37 32  
38 33  
39 34  
40 35  
41 36  
42 37  
43 38  
44 39  
45 40  
46 41  
47 42  
48 43  
49 44  
50 45  
51 46  
52 47  
53 48  
54 49  
55 50  
56 51  
57 52  
58 53  
59 54  
60 55

24 Any inquiry with regards to this article should be directed to the correspondence author:

25 **Dr Muhammad Nur Amir Bin Abdul Rassip, M.D.** (MPM 46977)

26 Research Medical Officer UD 48

27 Institute for Health Management, Ministry of Health Malaysia

28 Block B1, National Institutes of Health (NIH) Complex

29 No.1, Jalan Setia Murni U13/52

30 Section U13 Setia Alam

31 40170 Shah Alam, SELANGOR, MALAYSIA

32 Tel:03-336287400 ext:8313 / Fax:03-33627401

33 Email: nur.amir@moh.gov.my

34 ORCID iD: <https://orcid.org/0000-0002-8162-1380>

1  
2  
3 1 **Burnout and Coping Strategies among Nurses in Malaysia: A National-level Cross-**  
4 **sectional Study**  
5 2  
6 3  
7  
8

9 4 **ABSTRACT**

10 5 **Objective:** As nurses are often considered the backbone of healthcare service, this study set  
11 6 out to determine the prevalence and risk factors among nurses working under the Ministry of  
12 7 Health (MOH) Malaysia, as well as the coping strategies applied by them.

13 8 **Design:** This cross-sectional study was conducted in 2019 among the nurses in the MOH  
14 9 healthcare facilities using complex sampling design with two-staged stratified cluster sampling.

15 10 **Setting and Participants:** A total of 2428 nurses from 32 hospitals and 28 district health  
16 11 offices answered the questionnaires based on Maslach Burnout Inventory for Human Services  
17 12 (MBI-HSS) and Brief COPE. Logistic regression was performed to identify associated factors  
18 13 of burnout among nurses.

19 14 **Primary and secondary outcome measures:** The outcome variables were prevalence of  
20 15 burnout and coping strategies. Odds ratios (OR) using 95% confidence intervals (CI) were  
21 16 calculated for categorical variables. Significant factors at the univariate level were entered into  
22 17 the multivariate logistic regression to identify independent predictors of burnout.

23 18 **Results:** One in four (24.4%) of the nurses experienced burnout at work. It was higher among  
24 19 hospital nurses (25.8%) than primary care nurses (19.3%). Those who were younger, single,  
25 20 and childless had a higher prevalence of burnout. The numbers of night shifts and double  
26 21 shifts were significant predictors of burnout. The use of dysfunctional coping strategies was  
27 22 positively correlated with the domains of emotional exhaustion, depersonalisation, and  
28 23 negatively correlated with personal accomplishment.

29 24 **Conclusion:** Interventions that promote the application of positive coping strategies should  
30 25 be implemented. Organisational-drive efforts must target the improvement of work schedules  
31 26 for nurses, and the establishment of a structured debriefing service for post-trauma  
32 27 counselling. Addressing modifiable stressors identified in this study at individual, institutional,  
33 28 and systemic levels will be beneficial to reduce the prevalence of burnout among nurses.

34 29  
35 30 **Keywords:** Burnout, nurse, primary care, hospital, Malaysia  
36  
37  
38  
39  
40  
41  
42  
43  
44  
45  
46  
47  
48  
49  
50  
51  
52  
53  
54  
55  
56  
57  
58  
59  
60

## Strength and Limitations of this Study

- This was the first nationwide study in Malaysia to determine the prevalence of burnout using a complex sampling analysis with a large sample size representative of the nursing population in the public healthcare sector
- The respondents included in this study consisted of two main groups of nurses from primary care and hospital settings
- The study adopts questionnaires based on the Maslach Burnout Inventory for Human Services (MBI-HSS) which are widely used internationally to measure burnout syndrome among nurses as well as Brief COPE to measure the strategies used for coping with stress
- As this was a cross sectional study, it was difficult to establish the link between the exposure and outcome as both are assessed at the same time
- Self-administered questionnaire was susceptible to recall bias and social desirability bias

## 1 Introduction

2  
3  
4  
5  
6  
7  
8  
9  
10  
11  
12  
13  
14  
15  
16  
17  
18  
19  
20  
21  
22  
23  
24  
25  
26  
27  
28  
29  
30  
31  
32  
33  
34  
35  
36  
37  
38  
39  
40  
41  
42  
43  
44  
45  
46  
47  
48  
49  
50  
51  
52  
53  
54  
55  
56  
57  
58  
59  
60

The concept of burnout was first described by Freudenberger as a syndrome of exhaustion of psychological and physical resources that commonly inflicted teachers, healthcare professionals, and social workers [1]. In 2019, under the 11th Revision of the International Classification of Diseases (ICD-11), burnout was categorised as an occupational phenomenon [2] and defined as a syndrome resulting from chronic workplace stress that has not been successfully managed. It follows the three dimensions established by Maslach and Jackson, namely emotional exhaustion (EE: feelings of energy depletion), depersonalisation (DP: increased mental distance from one's job), and personal accomplishment (PA: reduced professional efficacy [3].

Globally, the prevalence of burnout in the health sector has been extensively studied due to its close linkage with the wellbeing and productivity of healthcare workers (HCW) [4]. Recent reviews reported that burnout and poor mental wellbeing among HCW can lead to higher absenteeism and turnover rates. In addition to the significant financial costs from brain drain, burnout is also associated with increased adverse events and poorer patient satisfaction, subsequently leading to poorer quality and safety of patient care [5–8].

As early as 2013, a systematic review shows a prevalence rate of 22 to 40% of burnout among nurses in ten European countries [9]. In Malaysia, nurses represent the backbone of the healthcare workforce in the Ministry of Health (MOH) facilities. With an increasing workload on the healthcare system, the nursing work environment is becoming more demanding and challenging, thus predisposing nurses to burnout. The majority of burnout-related studies in Malaysia were single centred, hospital-based, or focused solely on medical doctors [10–12]. As the primary gatekeepers of MOH facilities, nurses are often the first line of contact with the general public. As a result, it is vital to ensure that nurses can function optimally in a healthy working environment to ensure patients' wellbeing.

This study aimed to determine the prevalence of burnout syndrome among nurses in MOH facilities in Malaysia and its association with the relevant sociodemographic and professional characteristics using the data from a national survey conducted in 2019, right before COVID-19 began. We also examined coping strategies used by the nurses in dealing with stressful conditions at work. The findings can provide vital baseline information on burnout among nurses during the pre-pandemic era in the attempt to guide the planning and implementation of preventive actions especially following the immeasurable workload and occupational burden brought on by the COVID-19 pandemic.

## 1 **Material and Methods**

2  
3  
4  
5  
6  
7  
8  
9  
10  
11  
12  
13  
14  
15  
16  
17  
18  
19  
20  
21  
22  
23  
24  
25  
26  
27  
28  
29  
30  
31  
32  
33  
34  
35  
36  
37  
38  
39  
40  
41  
42  
43  
44  
45  
46  
47  
48  
49  
50  
51  
52  
53  
54  
55  
56  
57  
58  
59  
60

1  
2  
3  
4  
5  
6  
7  
8  
9  
10  
11  
12  
13  
14  
15  
16  
17  
18  
19  
20  
21  
22  
23  
24  
25  
26  
27  
28  
29  
30  
31  
32  
33  
34  
35  
36  
37  
38  
39  
40  
41  
42  
43  
44  
45  
46  
47  
48  
49  
50  
51  
52  
53  
54  
55  
56  
57  
58  
59  
60

A national level cross-sectional study was conducted in September to December 2019 among the nurses working in the hospital and primary settings under the Ministry of Health (MOH) Malaysia. Complex sampling was applied to obtain a nationally representative population of nurses. A total of 2516 nurses from both the hospital and primary care settings were selected using a multistage stratified random sampling. Those who were on leaves of absence and with underlying psychiatric illness were excluded.

The sample size was calculated based on a single proportion for prevalence estimation. Based on 27.3% estimated prevalence of burnout [13], a design effect of 2.5, and a non-response rate of 20%, the sample size required for single data analysis was 953. However, as this consisted of two main groups of nurses from primary care and hospital settings, the sample size was multiplied by two and became 1906. Based on the latest workforce distribution data by the MOH Nursing Board, the proportion of nurses working in hospital and primary care settings were 82% and 18% respectively. Thus, the sample size required from hospitals was 1563 ( $1906 \times 82\%$ ). However, due to the low sample size of primary care side ( $1906 \times 18\% = 343$ ), it was adjusted as 953, the minimum sample size. Thus, the total sample size required for the study was 2516.

After that, a two-stage stratified cluster sampling was performed to select one state from each of the six zones in Malaysia, followed by the secondary stratum that was made up of 32 hospitals and 28 DHOs selected randomly from the six states in the primary stratum. Allocation of the sample to each state in Malaysia was done proportionately to the population size of nurses working in each state. The respondents were then randomly chosen from a list of nurses obtained from the liaison officers at each facility. A briefing was given to them to explain the objectives of study to the respondents and to highlight that their participation would be voluntary. Strict confidentiality was maintained and no identifier was used in the questionnaire. The participants were required to provide written informed consent before filling up the self-administered questionnaire. Completed questionnaires were returned to the investigators during the same session.

The questionnaire was prepared in dual languages of English and Malay (the national language of Malaysia). The first section of the questionnaire extracted information on the sociodemographic and professional characteristics of the nurses. In the next section, the Maslach Burnout Inventory for Human Services (MBI-HSS) was used to measure burnout



1  
2  
3 1 syndrome among nurses. It comprises 22 items under three domains: EE (nine items), DP  
4 2 (five items), and PA (eight items). All items are rated on a seven-point Likert scale from zero  
5 3 (never), one (few times a year), two (once a month), three (a few times a month), four (once  
6 4 a week), five (a few times a week), to six (every day). The total values from each domain were  
7 5 categorised accordingly as shown in Table 1. In this study, the operational definition of burnout  
8 6 followed the description whereby a nurse would be considered as burned out if he or she  
9 7 scored high on the dimensions of EE, DP, or both [14]. The translated version of MBI-HSS in  
10 8 the Malay language showed an overall Cronbach's alpha of 0.803, indicating a good internal  
11 9 consistency, thus making it culturally acceptable to be used in Malaysia [15].  
12  
13  
14  
15  
16  
17  
18

19 11 The Malay version [16] of the Brief COPE [17] was used to measure strategies used  
20 12 for coping with stress. The questionnaire is made up of 28 items grouped into 14 subscales  
21 13 measuring three coping strategies: dysfunctional (venting, denial, substance use, behavioural  
22 14 disengagement, self-distraction, self-blame), problem-focused (active coping, planning, use  
23 15 of instrumental support), emotion-focused (use of emotional support, positive reframing,  
24 16 acceptance, religion, humour).  
25  
26  
27  
28  
29

30 18 The data were analysed using Statistical Package for the Social Science (SPSS  
31 19 version 22) for complex sample analysis. The prevalence of burnout was calculated using  
32 20 sample weights and compared among all nurses under the MOH facilities in Malaysia. Sample  
33 21 weightage was carried out to allow references from person included in the sample to the  
34 22 populations from which they were drawn. It was to allow unbiased estimates, taking account  
35 23 into the fact that all persons in the population would not have the same probability of selection.  
36 24 Odds ratios (OR) using 95% confidence intervals (CI) were calculated for categorical  
37 25 variables. Significant factors with a p-value of <0.25 at the univariate level were entered into  
38 26 the multivariate logistic regression to identify independent predictors of burnout.  
39  
40  
41  
42  
43  
44  
45

## 46 28 **Patient and public involvement**

47  
48  
49 30 No patient or public involved.  
50  
51  
52

## 53 32 **Results**

54 33  
55  
56 34 A total of 2428 nurses participated in the survey, giving a response rate of 93.9%. After data  
57 35 cleaning, responses from 2418 nurses were included in the final analysis. Table 1 shows the  
58 36 baseline characteristics of respondents. The majority of them were married (83.7%), had one  
59  
60

1 to three children (59.2%), and aged between 31 to 40 years old (42.7%). More than half of the  
2 respondents (51.9%) had a diploma and had worked for more than 10 years (55.3%).  
3 Approximately two-thirds of the nurses (67.3%) spent more than half of their working hours  
4 performing direct clinical care on patients. As high as 63.1% of the respondents had to perform  
5 on-call or extended hour duties beyond normal working hours more than three times in a  
6 month. Based on the results in Table 2, approximately one in every four nurses (24.4%, 95%  
7 CI: 17.7, 32.6) suffered from burnout syndrome with high scores in EE, DP or both. The MBI  
8 score showed that 41.6% (95% CI 35.5, 48.0) of the nurses suffered from low PA, followed by  
9 23.9% (95% CI 17.3, 32.1) with high EE and 4.5% (95% CI 2.2, 9.1) with high DP.

For peer review only

1 Table 1: Baseline Characteristics of the Respondents

|                                                                       | <b>Variables</b> | <b>N</b>   | <b>%</b> |
|-----------------------------------------------------------------------|------------------|------------|----------|
| <b>Age</b>                                                            | Mean age (SD)    | 36.9 (8.1) |          |
| <b>Age Group (years)</b>                                              | 21- 30           | 638        | 26.4     |
|                                                                       | 31- 40           | 1033       | 42.7     |
|                                                                       | > 40             | 747        | 30.9     |
| <b>Marital Status</b>                                                 | Single           | 395        | 16.3     |
|                                                                       | Married          | 2023       | 83.7     |
| <b>No. of children</b>                                                | No child         | 502        | 20.9     |
|                                                                       | 1 - 3 child      | 1419       | 59.2     |
|                                                                       | > 3 child        | 475        | 19.9     |
| <b>Education level</b>                                                | Certificate      | 569        | 23.6     |
|                                                                       | Diploma          | 1720       | 71.2     |
|                                                                       | Degree and above | 126        | 5.2      |
| <b>Household Income</b>                                               | B40              | 788        | 37.0     |
|                                                                       | M40              | 1173       | 55.0     |
|                                                                       | T20              | 171        | 8.0      |
| <b>Level of Healthcare</b>                                            | Hospital         | 1524       | 63.0     |
|                                                                       | Primary Care     | 894        | 37.0     |
| <b>Year of Service (years)</b>                                        | 1 - 5            | 435        | 18.2     |
|                                                                       | 6 -10            | 635        | 26.5     |
|                                                                       | > 10             | 1322       | 55.3     |
| <b>Time spent on clinical activities</b>                              | > 50 %           | 1547       | 67.2     |
|                                                                       | < 50 %           | 756        | 32.8     |
| <b>Shift Work</b>                                                     | Yes              | 1056       | 44.6     |
|                                                                       | No               | 1311       | 55.4     |
| <b>Total number of shifts per month</b>                               | > 24X            | 544        | 49.8     |
|                                                                       | < 24 X           | 549        | 50.3     |
| <b>Total number of night shifts per month (evening + night)</b>       | > 6 x            | 409        | 40.7     |
|                                                                       | 1 -6 X           | 596        | 59.3     |
| <b>Total number of double shifts per month</b>                        | > 5x             | 103        | 25.9     |
|                                                                       | 1 - 4x           | 294        | 74.1     |
| <b>Total number of on-call / extended hours per month</b>             | 1 – 3 x          | 324        | 36.9     |
|                                                                       | 4 – 6 x          | 217        | 24.7     |
|                                                                       | > 7 x            | 338        | 38.4     |
| <b>Sleeping Hours</b>                                                 | <6 hours         | 673        | 28.8     |
|                                                                       | 6-7 hours        | 1305       | 55.9     |
|                                                                       | >7 hours         | 358        | 15.3     |
| <b>Encountered traumatic events at work</b>                           | Yes              | 667        | 27.7     |
|                                                                       | No               | 1737       | 72.3     |
| <b>Received debriefing/psychological support post-traumatic event</b> | Yes              | 189        | 28.8     |
|                                                                       | No               | 468        | 71.2     |
| <b>Travelling Time to Workplace</b>                                   | >30 minutes      | 444        | 18.5     |
|                                                                       | 16-30 minutes    | 817        | 34.1     |
|                                                                       | <15 minutes      | 1138       | 47.4     |

2 \*B40, M40, and T20 are the income categories that represent the bottom 40%, middle 40%,  
3 and the top 20% of income earners based on the Malaysian Department of Statistics (DOSM)  
4 Household Income and Basic Amenities (HIS/BA) survey

1 Table 2: Prevalence of Burnout by Domains among the Respondents

| Variables                              | Prevalence<br>(95% CI) |
|----------------------------------------|------------------------|
| <b>Burnout</b>                         |                        |
| • 2 domains                            | 24.4 (17.7, 32.6)      |
| <b>MBI Subscales</b>                   |                        |
| Emotional Exhaustion (EE $\geq$ 27)    | 23.9 (17.3, 32.1)      |
| Depersonalization (DP $\geq$ 13)       | 4.5 (2.2, 9.1)         |
| Personal Accomplishment (PA $\leq$ 31) | 41.6 (35.5, 48.0)      |

2  
3 Table 3 summarises the prevalence of burnout based on baseline characteristics.  
4 Younger age group (35.8, 95% CI: 28.3, 44.0), single (29.1, 95% CI: 13.2, 52.5) and childless  
5 (35.3, 95% CI: 30.1, 40.8) nurses recorded a higher prevalence of burnout than those who  
6 were older, married, and with child. The burnout level was the lowest among M40 household  
7 incomes (29.5, 95% CI: 20.7, 40.1) as compared to B40 and T20 groups. Hospital nurses  
8 reported a higher level of burnout than their counterparts in the primary care facilities.  
9 Furthermore, nurses who were less involved in clinical activities experienced a higher level of  
10 burnout (28.2, 95% CI: 22.1, 35.3). Shift work and after-office hour duties also led to a higher  
11 prevalence of burnout. Our study shows a 7% higher prevalence of burnout among nurses  
12 who performed shift work [Shift workers: 27.1% (95% CI: 18.2, 38.3), Non-shift workers: 20.7%  
13 (95% CI: 15.5, 27.1)]. While nurses who performed on-call or extended hours more than seven  
14 times, showed higher prevalence of burnout (24.4, 95% CI: 17.1, 33.7) as compared to those  
15 who performed between 1 to 3 times (18.0, 95% CI: 7.8, 36.0) and 4 to 6 times (20.3, 95% CI  
16 14.1, 28.4). Among those who experienced a traumatic event at work, 39.9% (95% CI: 29.9,  
17 50.8) suffered from burnout and the prevalence is higher among those who did not receive  
18 any debriefing post-traumatic event from their superiors 36.8% (95% CI: 24.1, 51.7).

1  
2  
3 1 Table 3: Prevalence of Burnout and the domains of Emotional Exhaustion, Depersonalization,  
4 and Low Personal Accomplishment among Nurses by Sociodemographic and Professional  
5  
6 3 Characteristics  
7

|                                          | Burnout * |                                 |                            | High EE |                                 |                        | High DP |                                 |                            | Low PA |                                 |                            |
|------------------------------------------|-----------|---------------------------------|----------------------------|---------|---------------------------------|------------------------|---------|---------------------------------|----------------------------|--------|---------------------------------|----------------------------|
|                                          | n         | Estimate<br>d<br>populati<br>on | Prevalenc<br>e<br>(95% CI) | n       | Estimate<br>d<br>populati<br>on | Prevalence<br>(95% CI) | n       | Estimate<br>d<br>populati<br>on | Prevalenc<br>e<br>(95% CI) | n      | Estimate<br>d<br>populati<br>on | Prevalenc<br>e<br>(95% CI) |
| <b>Overall Nurses</b>                    | 686       | 15997                           | 24.4<br>(17.7, 32.6)       | 672     | 15667                           | 23.9<br>17.3, 32.1     | 142     | 2958                            | 4.5<br>(2.2, 9.1)          | 1018   | 27120                           | 41.6<br>(35.4, 48.1)       |
| <b>Age Group<br/>(years)</b>             |           |                                 |                            |         |                                 |                        |         |                                 |                            |        |                                 |                            |
| 21- 30                                   | 243       | 6401                            | 35.8<br>(28.3, 44.0)       | 239     | 6315                            | 35.3<br>(28.3, 42.9)   | 61      | 1480                            | 8.3<br>(4.8, 13.9)         | 323    | 8586                            | 48.0<br>(41.0, 55.0)       |
| 31- 40                                   | 277       | 6177                            | 24.2<br>(17.5, 32.4)       | 270     | 5972                            | 23.4<br>(17.1, 31.0)   | 56      | 1133                            | 4.4<br>(2.1, 9.2)          | 409    | 10363                           | 40.5<br>(34.3, 47.1)       |
| > 40                                     | 166       | 3420                            | 15.5<br>(7.5, 29.3)        | 163     | 3379                            | 15.3<br>(7.4, 29.1)    | 25      | 345                             | 1.6<br>(0.5, 4.8)          | 296    | 8313                            | 37.6<br>(26.6, 50.1)       |
| <b>Marital Status</b>                    |           |                                 |                            |         |                                 |                        |         |                                 |                            |        |                                 |                            |
| Single                                   | 144       | 3245                            | 29.1<br>(13.2, 52.5)       | 143     | 3221                            | 28.9<br>(13.2, 52.0)   | 35      | 746                             | 6.7<br>(2.5, 17.0)         | 200    | 6653                            | 59.7<br>(36.7, 79.2)       |
| Married                                  | 542       | 12752                           | 23.4<br>(18.4, 29.4)       | 529     | 12446                           | 22.9<br>(17.8, 28.8)   | 107     | 2211                            | 4.1<br>(1.7, 9.3)          | 828    | 20610                           | 37.9<br>(30.7, 45.6)       |
| <b>No. of children</b>                   |           |                                 |                            |         |                                 |                        |         |                                 |                            |        |                                 |                            |
| No child                                 | 188       | 4401                            | 35.3<br>(30.1, 40.8)       | 187     | 4377                            | 35.1<br>(30.1, 40.4)   | 44      | 877                             | 7.0<br>(4.0, 12.1)         | 260    | 6141                            | 49.2<br>(38.8, 59.8)       |
| 1 - 3 child                              | 394       | 9417                            | 24.7<br>(17.9, 33.2)       | 385     | 9175                            | 24.1<br>(17.3, 32.5)   | 82      | 1841                            | 4.8<br>(1.9, 12.0)         | 573    | 16990                           | 44.6<br>(33.3, 56.6)       |
| > 3 child                                | 98        | 2050                            | 14.0<br>(9.3, 20.5)        | 94      | 1987                            | 13.5<br>(9.1, 19.7)    | 15      | 226                             | 1.5<br>(0.8, 3.0)          | 185    | 3989                            | 27.2<br>(14.8, 44.6)       |
| <b>Education level</b>                   |           |                                 |                            |         |                                 |                        |         |                                 |                            |        |                                 |                            |
| Certificate                              | 120       | 1896                            | 15.6<br>(9.9, 23.7)        | 116     | 1844                            | 15.2<br>(9.6, 23.1)    | 22      | 249                             | 2.1<br>(0.7, 5.9)          | 213    | 2449                            | 48.9<br>(29.6, 68.6)       |
| Diploma                                  | 525       | 13265                           | 26.0<br>(19.3, 34.0)       | 515     | 12987                           | 25.5<br>(18.7, 33.6)   | 112     | 2589                            | 5.1<br>(2.5, 9.9)          | 757    | 20411                           | 40.0<br>(32.6, 47.9)       |
| Degree and<br>above                      | 41        | 836                             | 35.9<br>(24.5, 49.0)       | 41      | 836                             | 35.9<br>(24.6, 49.0)   | 8       | 119                             | 5.1<br>(1.7, 14.7)         | 55     | 865                             | 37.1<br>(23.8, 52.7)       |
| <b>Household Income</b>                  |           |                                 |                            |         |                                 |                        |         |                                 |                            |        |                                 |                            |
| B40                                      | 247       | 5657                            | 29.5<br>(20.7, 40.1)       | 241     | 5559                            | 29.0<br>(20.7, 39.0)   | 60      | 1242                            | 6.5<br>(3.2, 12.8)         | 346    | 8519                            | 44.5<br>(36.8, 52.4)       |
| M40                                      | 314       | 7664                            | 22.3<br>(16.2, 29.9)       | 307     | 7455                            | 21.7<br>(15.5, 29.6)   | 61      | 1298                            | 3.8<br>(1.6, 8.4)          | 478    | 12184                           | 35.5<br>(27.0, 45.0)       |
| T20                                      | 44        | 861                             | 28.6<br>(15.3, 47.0)       | 44      | 861                             | 28.6<br>(15.3, 47.0)   | 4       | 56                              | 1.8<br>(0.6, 5.2)          | 60     | 981                             | 32.6<br>(22.9, 44.1)       |
| <b>Level of Healthcare</b>               |           |                                 |                            |         |                                 |                        |         |                                 |                            |        |                                 |                            |
| Hospital                                 | 484       | 13351                           | 25.8<br>(16.6, 37.7)       | 474     | 13062                           | 25.2<br>(16.2, 37.1)   | 107     | 2580                            | 5.0<br>(2.1, 11.6)         | 707    | 23421                           | 45.3<br>(41.3, 49.3)       |
| Primary Care                             | 202       | 2646                            | 19.3<br>(14.4, 25.3)       | 198     | 2605                            | 18.9<br>(13.8, 25.4)   | 35      | 378                             | 2.7<br>(1.6, 4.7)          | 321    | 3842                            | 27.9<br>(21.0, 35.9)       |
| <b>Year of Service</b>                   |           |                                 |                            |         |                                 |                        |         |                                 |                            |        |                                 |                            |
| 1 - 5                                    | 155       | 3837                            | 34.2<br>(22.9, 47.7)       | 150     | 3740                            | 33.4<br>(22.9, 45.8)   | 42      | 973                             | 8.7<br>(4.3, 16.7)         | 215    | 5415                            | 48.3<br>(38.3, 58.4)       |
| 6 -10                                    | 206       | 5395                            | 29.5<br>(22.5, 37.6)       | 203     | 5262                            | 28.8<br>(22.1, 36.5)   | 41      | 1035                            | 5.7<br>(2.4, 12.8)         | 273    | 7574                            | 41.4<br>(34.1, 49.1)       |
| > 10                                     | 312       | 6528                            | 19.8<br>(15.1, 25.4)       | 306     | 6429                            | 19.5<br>(14.9, 25.0)   | 55      | 892                             | 2.7<br>(1.4, 5.2)          | 524    | 13933                           | 42.2<br>(29.7, 55.9)       |
| <b>Time Spent on Clinical Activities</b> |           |                                 |                            |         |                                 |                        |         |                                 |                            |        |                                 |                            |
| > 50 %                                   | 429       | 9461                            | 22.5<br>(15.2, 32.1)       | 420     | 9205                            | 21.9<br>(14.6, 31.6)   | 90      | 1878                            | 4.5<br>(2.4, 8.3)          | 641    | 17299                           | 41.2<br>(34.3, 48.7)       |
| < 50 %                                   | 756       | 5698                            | 28.2<br>(22.1, 35.3)       | 226     | 5623                            | 27.9<br>(22.1, 34.5)   | 49      | 933                             | 4.6<br>(1.5, 13.1)         | 335    | 8426                            | 41.7<br>(33.5, 50.5)       |
| <b>Shift Work</b>                        |           |                                 |                            |         |                                 |                        |         |                                 |                            |        |                                 |                            |

|                                                                        | Burnout * |                      |                     | High EE |                      |                     | High DP |                      |                     | Low PA |                      |                      |
|------------------------------------------------------------------------|-----------|----------------------|---------------------|---------|----------------------|---------------------|---------|----------------------|---------------------|--------|----------------------|----------------------|
|                                                                        | n         | Estimated population | Prevalence (95% CI) | n       | Estimated population | Prevalence (95% CI) | n       | Estimated population | Prevalence (95% CI) | n      | Estimated population | Prevalence (95% CI)  |
| No                                                                     | 319       | 5549                 | 20.7 (15.5, 27.1)   | 310     | 5319                 | 19.9 (14.3, 26.9)   | 61      | 997                  | 3.7 (1.9, 7.3)      | 522    | 10768                | 40.2 (22.7, 60.6)    |
| Yes                                                                    | 352       | 10175                | 27.1 (18.2, 8.3)    | 347     | 10075                | 26.8 (18.1, 37.8)   | 77      | 1916                 | 5.1 (2.3, 11.0)     | 482    | 15843                | 42.2 (31.9, 53.3)    |
| <b>Total number of shifts per month</b>                                |           |                      |                     |         |                      |                     |         |                      |                     |        |                      |                      |
| > 24X                                                                  | 189       | 5211                 | 27.2 (15.4, 43.5)   | 186     | 5146                 | 26.9 (15.3, 42.8)   | 33      | 611                  | 3.2 (0.8, 11.7)     | 243    | 6563                 | 34.3 (18.9, 53.8)    |
| < 24 X                                                                 | 178       | 5246                 | 27.5 (19.5, 37.1)   | 176     | 5200                 | 27.3 (19.3, 37.0)   | 48      | 1360                 | 7.1 (3.7, 13.5)     | 261    | 9702                 | 50.9 (43.3, 58.4)    |
| <b>Total number of night shifts per month</b>                          |           |                      |                     |         |                      |                     |         |                      |                     |        |                      |                      |
| > 6x                                                                   | 160       | 4424                 | 33.9 (23.6, 46.1)   | 159     | 4408                 | 33.8 (23.5, 46.0)   | 40      | 1076                 | 8.2 (4.4, 14.9)     | 193    | 5816                 | 44.6 (38.3, 51.1)    |
| 1 - 6x                                                                 | 175       | 5197                 | 22.9 (14.8, 33.6)   | 171     | 5113                 | 22.5 (14.7, 32.9)   | 34      | 663                  | 2.9 (0.7, 11.6)     | 268    | 9138                 | 40.2 (27.9, 54.0)    |
| <b>Total number of double shifts per month</b>                         |           |                      |                     |         |                      |                     |         |                      |                     |        |                      |                      |
| > 5x                                                                   | 38        | 1325                 | 35.5 (24.0, 48.8)   | 38      | 1325                 | 35.5 (24.0, 48.8)   | 13      | 352                  | 9.4 (3.3, 24.4)     | 46     | 1538                 | 41.2 (18.0, 69.0)    |
| 1 - 4x                                                                 | 119       | 3253                 | 32.3 (22.3, 44.2)   | 116     | 3198                 | 31.7 (22.1, 43.2)   | 30      | 727                  | 7.2 (3.7, 13.7)     | 136    | 4372                 | 43.4 (33.3, 54.1)    |
| <b>Total number of on-call / extended hours per month</b>              |           |                      |                     |         |                      |                     |         |                      |                     |        |                      |                      |
| 1 - 3 x                                                                | 78        | 1721                 | 18.0 (7.8, 36.0)    | 16      | 1591                 | 16.6 (6.0, 38.4)    | 11      | 253                  | 2.6 (0.8, 8.4)      | 125    | 4760                 | 49.7 (19.6, 79.9)    |
| 4 - 6 x                                                                | 57        | 834                  | 20.3 (14.1, 28.4)   | 57      | 834                  | 20.3 (14.1, 28.4)   | 14      | 238                  | 5.8 (2.5, 12.7)     | 78     | 1160                 | 28.2 (13.9, 49.0)    |
| > 7 x                                                                  | 87        | 1315                 | 24.4 (17.1, 33.7)   | 83      | 1266                 | 23.5 (16.3, 32.6)   | 17      | 165                  | 3.1 (1.2, 7.5)      | 115    | 1682                 | 31.2 (20.5, 44.5)    |
| <b>Sleeping Hours</b>                                                  |           |                      |                     |         |                      |                     |         |                      |                     |        |                      |                      |
| <6 hours                                                               | 262       | 6667                 | 35.7 (29.7, 42.2)   | 260     | 6619                 | 35.5 (29.6, 41.8)   | 58      | 1406                 | 7.5 (4.8, 11.6)     | 323    | 8344                 | 44.7 (36.3, 53.4)    |
| 6-7 hours                                                              | 344       | 7564                 | 20.7 (13.2, 31.0)   | 334     | 7319                 | 20.0 (12.6, 30.3)   | 69      | 1299                 | 3.6 (1.3, 9.1)      | 529    | 15363                | 42.0 (35.9, 48.4)    |
| >7 hours                                                               | 66        | 1433                 | 17.0 (12.8, 22.1)   | 64      | 1395                 | 16.5 (12.2, 22.0)   | 14      | 246                  | 2.9 (0.9, 9.5)      | 141    | 2996                 | 35.4 (21.6, 52.2)    |
| <b>Encountered traumatic events at work</b>                            |           |                      |                     |         |                      |                     |         |                      |                     |        |                      |                      |
| Yes                                                                    | 321       | 7253                 | 39.9 (29.9, 50.8)   | 314     | 7058                 | 38.9 (28.4, 50.5)   | 76      | 1759                 | 9.7 (7.7, 12.2)     | 340    | 7973                 | 43.9 (31.7, 56.9)    |
| No                                                                     | 362       | 8686                 | 18.5 (12.8, 26.0)   | 355     | 8550                 | 18.2 (12.7, 25.5)   | 65      | 1192                 | 2.5 (0.6, 9.4)      | 680    | 19317                | 40.8 (32.1, 50.1)    |
| <b>Received debriefing/psychological support post- traumatic event</b> |           |                      |                     |         |                      |                     |         |                      |                     |        |                      |                      |
| Yes                                                                    | 73        | 1423                 | 19.5 (7.3, 42.8)    | 65      | 1291                 | 19.8 (6.8, 45.7)    | 15      | 235                  | 3.6 (1.1, 11.3)     | 199    | 2175                 | 33.4 (11.2, 55.5)    |
| No                                                                     | 349       | 7669                 | 36.8 (24.1, 51.7)   | 246     | 5709                 | 49.6 (40.0, 59.2)   | 61      | 1531                 | 13.3 (8.2, 20.8)    | 238    | 5752                 | 50.0 (39.1, 60.9)243 |
| <b>Travelling Time to Workplace</b>                                    |           |                      |                     |         |                      |                     |         |                      |                     |        |                      |                      |
| >30 minutes                                                            | 158       | 3514                 | 30.6 (17.5, 47.8)   | 153     | 3435                 | 29.9 (17.1, 46.8)   | 32      | 637                  | 5.5 (2.1, 13.6)     | 220    | 6885                 | 59.9 (40.9, 76.4)    |
| 16-30 minutes                                                          | 260       | 5611                 | 25.0 (16.1, 36.9)   | 255     | 5526                 | 24.7 (16.1, 35.9)   | 65      | 1207                 | 5.4 (2.2, 12.7)     | 358    | 9449                 | 42.2 (30.2, 55.2)    |
| <15 minutes                                                            | 264       | 6824                 | 21.7 (16.8, 27.5)   | 260     | 6659                 | 21.1 (15.9, 27.6)   | 44      | 1109                 | 3.5 (1.7, 7.0)      | 438    | 10805                | 34.3 (27.9, 41.5)    |

1 Problem focused coping strategies are positively related to PA domain in MBI. An  
 2 increase of one point score in active coping and planning led to 2.4 and 2.6 points increase in  
 3 the score of PA. In contrast, dysfunctional coping strategies are negatively related to PA. The  
 4 results showed that one point increase in the score of substance use, self-blame and  
 5 behavioural disengagement resulted in 1.1, 1.6, and 2.0 points reduction in the PA score. As  
 6 for the domain of EE, the significant predictor that led to higher score of EE included the use  
 7 of behavioural disengagement (4.4), venting (3.8), substance use (2.7), humour (2.5), self-  
 8 distraction (2.4), and use of emotional support (1.8). There are several coping strategies that  
 9 are significant predictors of high DP (as shown in Table 4).

10  
 11 Table 4: Influence of different coping strategies on emotional exhaustion, depersonalization,  
 12 and personal accomplishment

| Coping (brief COPE)                      | Emotional exhaustion<br><i>B</i> ( <i>r</i> <sup>2</sup> ) | Depersonalization<br><i>B</i> ( <i>r</i> <sup>2</sup> ) | Personal<br>accomplishment<br><i>B</i> ( <i>r</i> <sup>2</sup> ) |
|------------------------------------------|------------------------------------------------------------|---------------------------------------------------------|------------------------------------------------------------------|
| <b>Problem-focused coping strategies</b> |                                                            |                                                         |                                                                  |
| Active coping                            | 1.041(0.02)                                                | -0.032(0.00)                                            | 2.418(0.17)**                                                    |
| Planning                                 | 0.562(0.00)                                                | -0.083(0.00)                                            | 2.557(0.18)**                                                    |
| Use of instrumental support              | 1.408(0.04)                                                | 0.269(0.01)                                             | 0.614(0.01)                                                      |
| <b>Emotion-focused coping strategies</b> |                                                            |                                                         |                                                                  |
| Use of emotional support                 | 1.803(0.07)*                                               | 0.331(0.02)**                                           | 0.737(0.02)                                                      |
| Positive reframing                       | 0.385(0.00)                                                | -0.218(0.01)                                            | 2.224(0.13)**                                                    |
| Acceptance                               | 1.500(0.04)                                                | 0.237(0.01)                                             | 1.570(0.09)                                                      |
| Religion                                 | -0.470(0.00)                                               | -0.290(0.01)*                                           | 1.381(0.04)**                                                    |
| Humour                                   | 2.455(0.07)**                                              | 0.843(0.07)***                                          | -0.436(0.00)                                                     |
| <b>Dysfunctional coping strategies</b>   |                                                            |                                                         |                                                                  |
| Venting                                  | 3.771(0.18)**                                              | 0.944(0.09)**                                           | -0.812(0.02)                                                     |
| Denial                                   | 1.807(0.04)                                                | 0.938(0.09)***                                          | -1.124(0.00)                                                     |
| Substance use                            | 2.652(0.01)**                                              | 0.973(0.01)*                                            | -1.127(0.00)*                                                    |
| Behavioral disengagement                 | 4.350(0.18)***                                             | 1.293(0.13)***                                          | -2.000(0.07)***                                                  |
| Self-distraction                         | 2.428(0.13)**                                              | 0.396(0.03)**                                           | 0.885(0.03)                                                      |
| Self-blame                               | 1.702(0.04)                                                | 0.698(0.06)*                                            | -1.602(0.07)**                                                   |

13 \**p* < 0.05; \*\* *p* < 0.01; \*\*\* *p* < 0.000

14  
 15 Table 5 shows the association between baseline variables and the risk of burnout  
 16 using univariate logistic regression. Age group, number of children, and education level were  
 17 closely associated with the development of burnout and its subdomains of high EE and high  
 18 DP. Younger nurses between 21 and 30 years were more likely to experience burnout  
 19 compared those who were older (*p* = 0.010). Similarly, for the subdomains of burnout, younger

1  
2  
3 1 nurses were more likely to experience high EE and high DP compared to those who above 40  
4 2 years of age. Nurse with no children or less than three children were 3.4 and 2.2 times more  
5 3 likely to have burnout as compared to those with more than three children. A lower number of  
6 4 children also appeared to be a predisposing factor of the subdomains of burnout in which  
7 5 childless nurses were significantly associated with high EE ( $p = 0.000$ ), high DP ( $p = 0.005$ )  
8 6 and low PA ( $p = 0.026$ ).  
9  
10  
11  
12  
13  
14  
15  
16  
17  
18  
19  
20  
21  
22  
23  
24  
25  
26  
27  
28  
29  
30  
31  
32  
33  
34  
35  
36  
37  
38  
39  
40  
41  
42  
43  
44  
45  
46  
47  
48  
49  
50  
51  
52  
53  
54  
55  
56  
57  
58  
59  
60

For peer review only



1 Table 5: Association between demographic and professional characteristics with burnout  
 2 using univariate logistic regression

|                                              | Burnout*              |              | High EE               |              | High DP                |              | Low PA                |              |
|----------------------------------------------|-----------------------|--------------|-----------------------|--------------|------------------------|--------------|-----------------------|--------------|
|                                              | Crude OR (95% CI)     | p-value      | Crude OR (95% CI)     | p-value      | Crude OR (95% CI)      | p value      | Crude OR (95% CI)     | p value      |
| <b>Age Group (years)</b>                     |                       |              |                       |              |                        |              |                       |              |
| 21- 30                                       | 3.04<br>(1.45 - 6.38) | <b>0.010</b> | 3.02<br>(1.44 - 6.35) | <b>0.011</b> | 5.67<br>(2.74 - 11.71) | <b>0.001</b> | 1.53<br>(0.88 - 2.64) | 0.108        |
| 31- 40                                       | 1.74<br>(0.66 - 4.60) | 0.211        | 1.69<br>(0.67 - 4.27) | 0.217        | 2.91<br>(1.15 - 7.39)  | <b>0.031</b> | 1.13<br>(0.62 - 2.04) | 0.634        |
| > 40                                         | 1                     |              | 1                     |              | 1                      |              | 1                     |              |
| <b>Marital Status</b>                        |                       |              |                       |              |                        |              |                       |              |
| Single                                       | 1.34<br>(0.60 - 2.98) | 0.402        | 1.37<br>(0.64 - 2.96) | 0.355        | 1.69<br>(0.46 - 6.21)  | 0.359        | 2.43<br>(0.79 - 7.50) | 0.102        |
| Married                                      | 1                     |              | 1                     |              | 1                      |              | 1                     |              |
| <b>No. of children</b>                       |                       |              |                       |              |                        |              |                       |              |
| No child                                     | 3.36<br>(2.36 - 4.79) | <b>0.000</b> | 3.46<br>(2.47 - 4.83) | <b>0.000</b> | 4.83<br>(1.96 - 11.92) | <b>0.005</b> | 2.60<br>(1.17 - 5.76) | <b>0.026</b> |
| 1 - 3 child                                  | 2.02<br>(1.26 - 3.22) | <b>0.011</b> | 2.03<br>(1.32 - 3.11) | <b>0.007</b> | 3.25<br>(0.75 - 14.15) | 0.098        | 2.16<br>(0.71 - 6.58) | 0.141        |
| > 3 child                                    | 1                     |              | 1                     |              | 1                      |              | 1                     |              |
| <b>Education level</b>                       |                       |              |                       |              |                        |              |                       |              |
| Degree and above                             | 3.02<br>(1.61 - 5.67) | <b>0.005</b> | 3.12<br>(1.65 - 5.90) | <b>0.005</b> | 2.57<br>(1.23 - 5.36)  | <b>0.020</b> | 0.62<br>(0.29 - 1.28) | 0.154        |
| Diploma                                      | 1.89<br>(1.22 - 2.96) | <b>0.012</b> | 1.91<br>(1.19 - 3.06) | <b>0.015</b> | 2.55<br>(1.21 - 5.39)  | <b>0.022</b> | 0.69<br>(0.28 - 1.76) | 0.376        |
| Certificate                                  | 1                     |              | 1                     |              | 1                      |              | 1                     |              |
| <b>Household Income</b>                      |                       |              |                       |              |                        |              |                       |              |
| B 40                                         | 1.05<br>(0.38 - 2.89) | 0.917        | 1.02<br>(0.37 - 2.81) | 0.962        | 3.68<br>(1.89 - 7.15)  | <b>0.003</b> | 1.66<br>(0.90 - 3.05) | 0.089        |
| M 40                                         | 0.72<br>(0.30 - 1.70) | 0.383        | 0.69<br>(0.29 - 1.65) | 0.339        | 2.09<br>(1.17 - 3.71)  | <b>0.020</b> | 1.14<br>(0.55 - 2.36) | 0.682        |
| T 20                                         | 1                     |              | 1                     |              | 1                      |              | 1                     |              |
| <b>Level of Healthcare</b>                   |                       |              |                       |              |                        |              |                       |              |
| Hospital                                     | 1.46<br>(0.63-3.38)   | 0.308        | 1.45<br>(0.62 - 3.37) | 0.324        | 1.86<br>(0.48 - 7.26)  | 0.307        | 2.14<br>(1.33 - 3.44) | <b>0.008</b> |
| Primary Care                                 | 1                     |              | 1                     |              | 1                      |              | 1                     |              |
| <b>Year of Service (years)</b>               |                       |              |                       |              |                        |              |                       |              |
| 1 - 5                                        | 2.11<br>(1.49 - 2.99) | <b>0.002</b> | 2.07<br>(1.51 - 2.84) | <b>0.001</b> | 3.42<br>(2.09 - 5.57)  | <b>0.001</b> | 1.28<br>(0.66 - 2.49) | 0.402        |
| 6 -10                                        | 1.69<br>(1.04 - 2.78) | <b>0.039</b> | 1.67<br>(1.07 - 2.60) | <b>0.030</b> | 2.16<br>(1.29 - 3.62)  | <b>0.011</b> | 0.97<br>(0.56 - 1.67) | 0.885        |
| > 10                                         | 1                     |              | 1                     |              | 1                      |              | 1                     |              |
| <b>Time spend on clinical activities</b>     |                       |              |                       |              |                        |              |                       |              |
| > 50 %                                       | 0.74<br>(0.54 - 1.02) | 0.062        | 0.73<br>(0.53 - 1.01) | 0.053        | 0.97<br>(0.49 - 1.93)  | 0.908        | 0.98<br>(0.69 - 1.39) | 0.887        |
| < 50 %                                       | 1                     |              | 1                     |              | 1                      |              | 1                     |              |
| <b>Shift Work</b>                            |                       |              |                       |              |                        |              |                       |              |
| Yes                                          | 1.42<br>(0.95-2.13)   | 0.076        | 1.48<br>(0.99-2.24)   | 0.060        | 1.39<br>(0.83-2.34)    | 0.170        | 1.09<br>(0.33-3.54)   | 0.870        |
| No                                           | 1                     |              | 1                     |              | 1                      |              | 1                     |              |
| <b>Total number of shifts per month</b>      |                       |              |                       |              |                        |              |                       |              |
| > 24X                                        | 1.11<br>(0.86-1.43)   | 0.417        | 0.98<br>(0.94-1.03)   | 0.394        | 0.43<br>(0.39-0.47)    | <b>0.000</b> | 0.50<br>(0.48-0.52)   | <b>0.000</b> |
| < 24 X                                       | 1                     |              | 1                     |              | 1                      |              | 1                     |              |
| <b>Total number of night shift per month</b> |                       |              |                       |              |                        |              |                       |              |
| > 6x                                         | 1.55                  | <b>0.001</b> | 1.76                  | <b>0.000</b> | 2.99                   | <b>0.000</b> | 1.19                  | <b>0.000</b> |

|                                                                       | Burnout*           |              | High EE            |              | High DP             |              | Low PA             |              |
|-----------------------------------------------------------------------|--------------------|--------------|--------------------|--------------|---------------------|--------------|--------------------|--------------|
|                                                                       | Crude OR (95% CI)  | p-value      | Crude OR (95% CI)  | p-value      | Crude OR (95% CI)   | p value      | Crude OR (95% CI)  | p value      |
| 1 - 6x                                                                | 1                  |              | 1                  |              | 1                   |              | 1                  |              |
| <b>Total number of double shifts per month</b>                        |                    |              |                    |              |                     |              |                    |              |
| > 5x                                                                  | 1.15 (1.07-1.25)   | <b>0.000</b> | 1.18 (1.09-1.28)   | <b>0.000</b> | 1.34 (1.17-1.53)    | <b>0.000</b> | 0.91 (0.85-0.99)   | <b>0.019</b> |
| 1 - 4x                                                                | 1                  |              | 1                  |              | 1                   |              | 1                  |              |
| <b>Total number of on call / extended hours per month</b>             |                    |              |                    |              |                     |              |                    |              |
| > 7 x                                                                 | 1.48 (0.41 - 5.26) | 0.483        | 1.54 (0.35 - 6.73) | 0.498        | 1.17 (0.19 - 7.26)  | 0.839        | 0.46 (0.12 - 1.76) | 0.206        |
| 4 - 6 x                                                               | 1.16 (0.36 - 3.74) | 0.760        | 1.28 (0.33 - 4.96) | 0.670        | 2.27 (0.49 - 10.46) | 0.236        | 0.39 (0.14 - 1.15) | 0.078        |
| 1 - 3 x                                                               | 1                  |              | 1                  |              | 1                   |              | 1                  |              |
| <b>Sleeping Hours</b>                                                 |                    |              |                    |              |                     |              |                    |              |
| <6 hours                                                              | 2.72 (1.78 - 4.16) | <b>0.001</b> | 2.78 (1.78-4.35)   | <b>0.001</b> | 2.72 (1.06-7.00)    | 0.041        | 1.47 (0.77-2.81)   | 0.191        |
| 6-7 hours                                                             | 1.28 (0.78 - 2.09) | 0.270        | 1.27 (0.76-2.13)   | 0.307        | 1.23 (0.73-2.08)    | 0.367        | 1.32 (0.79-2.24)   | 0.245        |
| >7 hours                                                              | 1                  |              | 1                  |              | 1                   |              | 1                  |              |
| <b>Encountered traumatic event at work</b>                            |                    |              |                    |              |                     |              |                    |              |
| Yes                                                                   | 2.92 (2.24 - 3.81) | <b>0.000</b> | 2.85 (2.17-3.76)   | <b>0.000</b> | 4.11 (1.24-13.7)    | 0.028        | 1.14 (0.55-2.35)   | 0.685        |
| No                                                                    | 1                  |              | 1                  |              | 1                   |              | 1                  |              |
| <b>Received debriefing/psychological support post traumatic event</b> |                    |              |                    |              |                     |              |                    |              |
| Yes                                                                   | 0.42 (0.11 - 1.62) | 0.165        | 0.25 (0.06-1.05)   | 0.056        | 0.36 (0.08-1.58)    | 0.143        | 0.60 (0.15-2.41)   | 0.404        |
| No                                                                    | 1                  |              | 1                  |              | 1                   |              | 1                  |              |
| <b>Travelling Time to Workplace</b>                                   |                    |              |                    |              |                     |              |                    |              |
| >30 minutes                                                           | 1.59 (0.89 - 2.86) | 0.100        | 1.59 (0.91-2.79)   | 0.091        | 1.61 (0.54-4.77)    | 0.329        | 2.86 (1.04-7.84)   | 0.044        |
| 16-30 minutes                                                         | 1.21 (0.79 - 1.85) | 0.326        | 1.22 (0.80-1.86)   | 0.292        | 1.56 (1.01-2.41)    | <b>0.047</b> | 1.39 (0.85-2.30)   | 0.155        |
| <15 minutes                                                           | 1                  |              | 1                  |              | 1                   |              | 1                  |              |

As the education level increased, the prevalence of burnout increased by 1.9 times among diploma holders (COR: 1.89; 95% CI, 1.22–2.96;  $p=0.012$ ) and 3.0 times among nurses with degree or higher level of qualifications (COR: 3.02; 95% CI, 1.61–5.67;  $p=0.005$ ). Similar association was observed for the subdomains of high EE and high DP. While household income did not show any significant association with the overall burnout syndrome, nurses from the B40 and M40 household income group were 3.7 and 2.1 times more likely to experience high DP as compared to their counterparts in the highest T20 income group. It is important to note that burnout was not associated with the level of healthcare whether they worked in hospital or primary care setting.

All variables with  $p<0.25$  at univariate level were included in the multivariate logistic regression to determine the predictors for burnout among the nurses (Table 6). Having to work more night shifts, less sleeping hours and experienced traumatic events at work were

1  
2  
3 1 significant predictors for burnout, while receiving debriefing post traumatic events as one of  
4 the protective factors for nurses. As for the subdomains of burnout, variable predicting high  
5 2 EE included number of night shift, sleeping hours, traumatic event. While, number of night  
6 3 shift as the predictor of high DP and for low PA, younger age group, higher number of shifts  
7 4 working, double shift, longer time travelling to workplace were the predictor based on the  
8 5 multivariate logistic regression results.  
9 6  
10  
11  
12  
13  
14  
15  
16  
17  
18  
19  
20  
21  
22  
23  
24  
25  
26  
27  
28  
29  
30  
31  
32  
33  
34  
35  
36  
37  
38  
39  
40  
41  
42  
43  
44  
45  
46  
47  
48  
49  
50  
51  
52  
53  
54  
55  
56  
57  
58  
59  
60

For peer review only

1 Table 6: Association between sociodemographic and professional factors with burnout  
 2 among nurses using multivariate logistic regression  
 3

|                                              | Burnout*              |         | High EE               |         | High DP                   |         | Low PA                |         |
|----------------------------------------------|-----------------------|---------|-----------------------|---------|---------------------------|---------|-----------------------|---------|
|                                              | Adjusted OR (95% CI)  | p value | Adjusted OR (95% CI)  | p value | Adjusted OR (95% CI)      | p value | Adjusted OR (95% CI)  | p value |
| <b>Age Group (years)</b>                     |                       |         |                       |         |                           |         |                       |         |
| 21- 30                                       | 0.94<br>(0.18 – 4.95) | 0.930   | 1.04<br>(0.26 – 4.22) | 0.942   | 0.07<br>(0.00 – 11.03)    | 0.240   | 2.10<br>(0.69 – 6.39) | 0.154   |
| 31- 40                                       | 0.78<br>(0.18 – 3.39) | 0.699   | 0.73<br>(0.21 – 2.59) | 0.570   | 4.13<br>(0.40 – 42.19)    | 0.178   | 2.23<br>(1.46 – 3.39) | 0.003   |
| > 40                                         | 1                     |         | 1                     |         | 1                         |         | 1                     |         |
| <b>Marital Status</b>                        |                       |         |                       |         |                           |         |                       |         |
| Single                                       |                       |         |                       |         |                           |         | 0.56<br>(0.24 – 1.32) | 0.148   |
| Married                                      |                       |         |                       |         |                           |         | 1                     |         |
| <b>No of Children</b>                        |                       |         |                       |         |                           |         |                       |         |
| No child                                     | 2.13<br>(0.98 – 4.65) | 0.055   | 2.19<br>(0.88 – 5.45) | 0.081   | 0.45<br>(0.01 – 14.69)    | 0.585   | 1.55<br>(0.39 – 6.19) | 0.470   |
| 1 - 3 child                                  | 1.57<br>(0.56 – 4.42) | 0.328   | 1.42<br>(0.56 – 3.65) | 0.395   | 7.53<br>(0.55 – 104.08)   | 0.105   | 0.91<br>(0.58 – 1.44) | 0.645   |
| > 3 child                                    | 1                     |         | 1                     |         | 1                         |         | 1                     |         |
| <b>Education level</b>                       |                       |         |                       |         |                           |         |                       |         |
| Degree and above                             | 0.36<br>(0.04 – 2.97) | 0.281   | 0.37<br>(0.04 – 3.69) | 0.328   | 0.29<br>(0.05 – 1714.76)  | 0.727   | 0.35<br>(0.02 – 5.24) | 0.378   |
| Diploma                                      | 0.46<br>(0.09 – 2.54) | 0.311   | 0.43<br>(0.07 – 2.48) | 0.280   | 0.82<br>(0.00 – 280.84)   | 0.933   | 0.24<br>(0.03 – 2.02) | 0.152   |
| Certificate                                  | 1                     |         | 1                     |         | 1                         |         |                       |         |
| <b>Household Income</b>                      |                       |         |                       |         |                           |         |                       |         |
| B 40                                         |                       |         |                       |         | 5.39<br>(0.04 – 840.39)   | 0.431   | 2.76<br>(0.87 – 8.76) | 0.075   |
| M 40                                         |                       |         |                       |         | 3.22<br>(0.00 – 3041.25)  | 0.679   | 2.68<br>(1.19 – 6.08) | 0.025   |
| T 20                                         |                       |         |                       |         | 1                         |         | 1                     |         |
| <b>Level of Healthcare</b>                   |                       |         |                       |         |                           |         |                       |         |
| Hospital                                     |                       |         |                       |         |                           |         |                       |         |
| Primary Care                                 |                       |         |                       |         |                           |         |                       |         |
| <b>Year of Service (years)</b>               |                       |         |                       |         |                           |         |                       |         |
| 1 - 5                                        | 0.69<br>(0.18 – 2.61) | 0.514   | 0.49<br>(0.10 – 2.45) | 0.324   | 80.67<br>(0.70 – 9256.64) | 0.063   |                       |         |
| 6 -10                                        | 0.92<br>(0.26 – 3.22) | 0.881   | 0.76<br>(0.21 – 2.76) | 0.617   | 4.52<br>(0.491 – 41.68)   | 0.141   |                       |         |
| > 10                                         | 1                     |         | 1                     |         | 1                         |         |                       |         |
| <b>Time spent on clinical activities</b>     |                       |         |                       |         |                           |         |                       |         |
| > 50 %                                       | 0.91<br>(0.63 – 1.32) | 0.568   | 0.85<br>(0.62 – 1.17) | 0.265   |                           |         |                       |         |
| < 50 %                                       | 1                     |         | 1                     |         |                           |         |                       |         |
| <b>Shift Work</b>                            |                       |         |                       |         |                           |         |                       |         |
| Yes                                          | 0.64<br>(0.45 – 0.92) | 0.023   | 0.86<br>(0.59 – 1.25) | 0.360   | 1.85<br>(0.00 – 3817.23)  | 0.843   |                       |         |
| No                                           | 1                     |         | 1                     |         | 1                         |         |                       |         |
| <b>Total number of shifts per month</b>      |                       |         |                       |         |                           |         |                       |         |
| > 24X                                        |                       |         |                       |         | 2.61<br>(2.27 – 3.01)     | 0.000   | 2.28<br>(2.12 – 2.45) | 0.000   |
| < 24 X                                       |                       |         |                       |         | 1                         |         | 1                     |         |
| <b>Total number of night shift per month</b> |                       |         |                       |         |                           |         |                       |         |
| > 6x                                         | 1.54                  | 0.045   | 1.55                  | 0.000   | 2.52                      | 0.000   | 1.04                  | 0.240   |

|                                                                       | Burnout*               |         | High EE                |         | High DP                  |         | Low PA                |         |
|-----------------------------------------------------------------------|------------------------|---------|------------------------|---------|--------------------------|---------|-----------------------|---------|
|                                                                       | Adjusted OR (95% CI)   | p value | Adjusted OR (95% CI)   | p value | Adjusted OR (95% CI)     | p value | Adjusted OR (95% CI)  | p value |
|                                                                       | (1.01 - 2.36)          |         | (1.44 - 1.67)          |         | (2.18 - 2.90)            |         | (0.97 - 1.12)         |         |
| 1 - 6x                                                                | 1                      |         |                        |         |                          |         |                       |         |
| <b>Total number of double shifts per month</b>                        |                        |         |                        |         |                          |         |                       |         |
| > 5x                                                                  | 0.86<br>(0.54 - 1.37)  | 0.522   | 0.94<br>(0.87 - 1.02)  | 0.154   | 1.04<br>(0.89 - 1.21)    | 0.660   | 0.86<br>(0.79 - 0.93) | 0.000   |
| 1 - 4x                                                                | 1                      |         | 1                      |         | 1                        |         | 1                     |         |
| <b>Total number of on call / extended hours per month</b>             |                        |         |                        |         |                          |         |                       |         |
| > 7 x                                                                 |                        |         |                        |         | 2.47<br>(0.08 - 73.03)   | 0.522   | 0.65<br>(0.41 - 1.03) | 0.062   |
| 4 - 6 x                                                               |                        |         |                        |         | 4.69<br>(0.14 - 163.22)  | 0.314   | 0.64<br>(0.23 - 1.81) | 0.334   |
| 1 - 3 x                                                               |                        |         |                        |         | 1                        |         | 1                     |         |
| <b>Sleeping Hours</b>                                                 |                        |         |                        |         |                          |         |                       |         |
| <6 hours                                                              | 2.89<br>(1.40 - 5.97)  | 0.011   | 2.94<br>(1.36 - 6.38)  | 0.014   | 1.81<br>(0.77 - 4.24)    | 0.140   | 1.59<br>(0.69 - 2.62) | 0.064   |
| 6-7 hours                                                             | 1.62<br>(0.75 - 3.48)  | 0.176   | 1.43<br>(0.72 - 2.87)  | 0.252   | 1.24<br>(0.55 - 2.75)    | 0.543   | 1.28<br>(0.93 - 1.76) | 0.110   |
| >7 hours                                                              | 1                      |         | 1                      |         | 1                        |         | 1                     |         |
| <b>Encountered traumatic event at work</b>                            |                        |         |                        |         |                          |         |                       |         |
| Yes                                                                   | 4.19<br>(2.31 - 7.63)  | 0.001   | 4.42<br>(2.28 - 8.57)  | 0.002   | 2.99<br>(0.98 - 9.07)    | 0.053   |                       |         |
| No                                                                    | 1                      |         | 1                      |         | 1                        |         |                       |         |
| <b>Received debriefing/psychological support post traumatic event</b> |                        |         |                        |         |                          |         |                       |         |
| Yes                                                                   | 0.47<br>(0.28 - 0.79)  | 0.013   | 0.49<br>(0.28 - 0.88)  | 0.025   | 0.21<br>(0.01 - 3817.23) | 0.201   |                       |         |
| No                                                                    | 1                      |         | 1                      |         | 1                        |         |                       |         |
| <b>Travelling Time to Workplace</b>                                   |                        |         |                        |         |                          |         |                       |         |
| >30 minutes                                                           | 3.55<br>(0.69 - 18.09) | 0.106   | 3.95<br>(0.88 - 17.78) | 0.067   | 0.13<br>(0.01 - 2.06)    | 0.115   | 2.24<br>(1.18 - 4.23) | 0.021   |
| 16-30 minutes                                                         | 1.38<br>(0.45 - 4.23)  | 0.509   | 1.44<br>(0.58 - 3.62)  | 0.368   | 0.94<br>(0.14 - 6.24)    | 0.938   | 1.05<br>(0.29 - 3.76) | 0.928   |
| <15 minutes                                                           | 1                      |         | 1                      |         | 1                        |         |                       |         |

## Discussion

Burnout among healthcare workers is a global phenomenon that can cast a profound negative impact on the personal wellbeing and organisational performance. This study was planned and executed back in 2019 in view of the lack of national-level data on the prevalence and common predictors of burnout among nurses in Malaysia. The results have now become important baseline data to compare the pre- and post-pandemic level of burnout among the nurses in Malaysia. In this study, one in every four nurses experienced burnout. The prevalence of burnout (24.4%) was comparable to single-centred studies among nurses from teaching hospitals in Malaysia (27.3%) [13] and Thailand (22.0%) [18] but lower than the prevalence among nurses in Indonesia at 48.8% [19]. In contrast, the pool prevalence of burnout globally was lower at 11.2% [20], and in Brazil 18.3% [21]. While the actual prevalence of burnout is likely to be different across countries and settings, the differences can also be attributed to the tools and classifications of burnout used in each study.

1  
2  
3 1  
4  
5 2 With regard to the three domains of burnout, the nurses in this study experienced low  
6 3 PA (41.6%), high EE (23.9%), and high DP (4.5%). Similar results were reported among  
7  
8 4 primary care providers in China except for slightly higher prevalence under each domain in  
9  
10 5 the Chinese study (low PA: 41.4%, high EE: 33.1%, high DP: 8.8%) [22]. Compared to other  
11 6 studies with higher prevalence of high EE, high DP, and low PA, more nurses in this study  
12 7 had high PA and low DP. Malaysia recorded a slightly higher nurse to patient ratio at 1:297  
13 8 [23] than the 1:250 recommended by the World Health Organisation (WHO) (WHO, 2019). A  
14 9 high nurse-to patient ratio that indicated poor staffing and shortage of basic medical equipment  
15 10 at work station were significantly associated with the risk of developing EE [24-25]. Yeun and  
16 11 Kim described that supervisory support is vital in minimising the impact of EE impact by  
17 12 nurturing and instilling a sense of PA among the staff. In fact, this support is so essential that  
18 13 it is linked with retention of nurses in the service [26]. The high level of burnout in PA may also  
19 14 stemmed from the lower education level among our nurses as only 5.2% of them were degree  
20 15 holders compared to the their counterparts in the United States and Thailand who were mostly  
21 16 degree or master holders [27]. Hence, one of the long-term strategies to reduce nurses'  
22 17 burnout by enhancing their PA is by improving their access to further education to elevate their  
23 18 professional status [28].  
24 19

25 20 In terms of age group, younger age group of nurses were more susceptible to burnout.  
26 21 This is in line with previous studies from various countries [29–35]. In addition, similar to other  
27 22 studies [13, 30, 36], years of working experience was also associated with burnout whereby  
28 23 junior nurses experienced more burnout than senior nurses. This could be attributed to the  
29 24 fact that junior nurses have yet to master the nursing skills, thus requiring longer period to  
30 25 complete their tasks. They might also lack the resilience in managing the occupational stress  
31 26 that often developed with longer years of experience at work [31, 36–38].  
32 27

33 28 With regard to the association between burnout with marital status and number of  
34 29 children of the nurses, there have been contradictory findings in the research. In this study,  
35 30 burnout was higher among nurses who were single. Some studies reported that single nurses  
36 31 tend to have less social and family support, thus predisposing them to burnout [37, 39–41].  
37 32 Furthermore, in this study, lower number of children was a significant predictor of burnout.  
38 33 However, most of the published studies reported the opposite whereby nurses with children  
39 34 were associated with higher EE and decreased PA, likely due to the additional obligations and  
40 35 potential family-work conflicts [31, 42, 43].  
41 36  
42  
43  
44  
45  
46  
47  
48  
49  
50  
51  
52  
53  
54  
55  
56  
57  
58  
59  
60

1  
2  
3 1 Working schedule also plays a vital role in the development of burnout, especially  
4 2 among hospital nurses who need to perform shift duties. In this study, while the total number  
5 3 of shifts per month was not a significant factor in the development of burnout, univariate logistic  
6 4 regression showed that the number of night shifts and double shifts significantly increased the  
7 5 prevalence of overall burnout and its three domains. Similar findings were noted among  
8 6 nurses in China and Thailand [18, 35, 44-45]. Shift work rotation may cause a disruption in the  
9 7 circadian rhythm and sleeping patterns of the involved staff. Previous research found that  
10 8 nurses on more rotational shifts or night shifts were more likely to suffer from negative physical  
11 9 and psychological health impacts [46]. Additionally, night shift workers commonly experience  
12 10 excessive daytime fatigue and somnolence that predispose them to higher risk EE and DP  
13 11 [47]. Shift work is an integral part of the nursing profession. While the nature of shift work will  
14 12 be hard to modify, it is vital to integrate important components such as sleep hygiene and  
15 13 psychosocial support in nursing education curriculum to better equip our nurses in facing the  
16 14 impending challenges.  
17 15

16 16 Healthcare workers, especially doctors and nurses, are often exposed to highly  
17 17 stressful traumatic events such as witnessing deaths or desirous injuries, dealing with patients  
18 18 with critical illness, and managing the demands of patients' relative. Often, nurses are  
19 19 expected to remain stoic and continue caring for the patients after these stressful situations,  
20 20 subsequently leading to the development of burnout. Debriefing or psychology support was  
21 21 proposed as one of the ways to reduce incidence of burnout post traumatic events [48].  
22 22 Debriefing, taking regular breaks, and utilising stress reduction measures throughout shifts  
23 23 have been demonstrated to reduce the risk of burnout among nurses [49]. However, only  
24 24 one-quarter of nurses who encountered traumatic events at work received debriefing. A  
25 25 structured debriefing system should be put in place in the health facilities to provide  
26 26 psychological support for nurses after a traumatic event to ensure their mental wellbeing.  
27 27

28 28 In this study, we also evaluated the coping mechanisms applied by the nurses using  
29 29 the COPE Inventory. Different coping strategies can have varying effects on their personal  
30 30 emotion and work approaches. Problems-focused coping responses to distress reflects the  
31 31 cognitive and behavioural efforts in resolving life stressors. Both problems-focused and  
32 32 emotion-focused coping can be beneficial in dealing with stressors [50]. In a recent study, the  
33 33 use of emotion-focused and dysfunctional coping styles was linked to higher levels of EE,  
34 34 whereas problem-focused coping styles was linked to lower scores of DP higher scores of PA  
35 35 [51]. In this study, the use of religion as an emotion-focused coping strategy showed a positive  
36 36 correlation with high PA and low DP. Similarly, in Pakistan [52] and Palestine [53], praying  
37 37 and other religious activities were the highest-ranked coping techniques practised by the

1  
2  
3 1 healthcare workers. Religious belief was shown to be helpful to assist nurses in dealing with  
4 2 challenges at work and maintaining the quality of healthcare [54-55]. In contrast, the use of  
5 3 dysfunctional coping mechanism has been linked with mood disturbances and poor mental  
6 4 health [40, 55]. A high number of nurses relied on dysfunctional coping strategies such as  
7 5 behavioural disengagement and venting that led to significant increase in burnout and the  
8 6 three domains. This echoed the findings of two other studies whereby dysfunctional coping  
9 7 was strongly linked to EE and DP [56-57].  
10 8

11 9 An effective coping mechanism may reduce burnout among nurses and may boost  
12 10 productivity as well as the quality of life [58]. Therefore, educational and training programmes  
13 11 to improve nurses' coping skills should be implemented from an early stage to better prepare  
14 12 them psychosocial distress at work. Other organisational measures including multidisciplinary  
15 13 psychosocial support such as debriefing post traumatic event and involvement of healthcare  
16 14 professionals in the creation, testing, and assessment of preventive measures against burnout  
17 15 can also be considered to reduce burnout [48, 59-60].  
18 16

19 17 This was the first nationwide study in Malaysia to determine the prevalence of burnout  
20 18 using a complex sampling analysis with a large sample size representative of the nursing  
21 19 population in the public healthcare sector. The identified risk factors for burnout enable the  
22 20 policymakers and hospital managers to implement effective preventive initiatives that target  
23 21 the susceptible population. However, there are some limitations to this study. As this was a  
24 22 cross sectional study, it was difficult to establish the link between the exposure and outcome  
25 23 as both are assessed at the same time. In addition, self-administered questionnaire was  
26 24 susceptible to recall bias and social desirability bias. Future research should consider  
27 25 longitudinal studies to establish the causal relation between predisposing factors and burnout.  
28 26

## 27 **Conclusion**

28  
29 29 In this study, as high as one in four public nurses suffer from burnout in Malaysia. Nurses who  
30 30 were younger, single, childless, and working in hospitals recorded a higher level of burnout.  
31 31 Night shifts and double shifts were predictors of the development of burnout. Nurses represent  
32 32 the main workforce of front liners in the Malaysian health workforce. Following the two years  
33 33 battle with the COVID-19 pandemic, known and new stressors are likely intensified,  
34 34 predisposing nurses to higher level of strain and potential burnout. Therefore, it is essential to  
35 35 implement the necessary preventive and promotive efforts among the high-risk vulnerable  
36 36 nurses identified in this study. Modifiable stressors must be addressed via inculcation of



1  
2  
3  
4  
5  
6  
7  
8  
9  
10  
11  
12  
13  
14  
15  
16  
17  
18  
19  
20  
21  
22  
23  
24  
25  
26  
27  
28  
29  
30  
31  
32  
33  
34  
35  
36  
37  
38  
39  
40  
41  
42  
43  
44  
45  
46  
47  
48  
49  
50  
51  
52  
53  
54  
55  
56  
57  
58  
59  
60

1 positive coping strategies to mitigate the potential mental health impact. Organisational reform  
2 in the form of legislation that promotes optimal staffing ratio is a critical component of a  
3 multitiered approach. Solutions must come from system-level efforts to reinvent and innovate  
4 workflow, human resources, and workplace wellness to decrease or eliminate burnout among  
5 nurses.

For peer review only

## 1 **Author Contributions**

2 NZ designed the project and data collection tools. All authors collected the data. NZ and NHZ  
3 cleaned, analysed and interpreted the data. NZ, NHZ and AR drafted the paper. KY reviewed  
4 and gave technical advisory towards the manuscript as well as contributed important revisions.  
5 All authors read and approved the manuscript. The corresponding author attests that all listed  
6 authors meet authorship criteria and that no others meeting the criteria have been omitted.

## 7 **Funding**

8 This study was supported by the National Institutes of Health grant [NMRR-18-3590 45274].

## 9 **Competing interest**

10 None declared.

## 11 **Patient and public involvement**

12 Patients and/or the public were not involved in the design, or conduct, or reporting, or  
13 dissemination plans of this research.

## 14 **Ethics approval**

15 Ethics clearance and approval was obtained from the Medical Research and Ethics  
16 Committee (MREC) of the Ministry of Health Malaysia prior to the conduct of this study, Ref:  
17 KKM/NIHSEC/P19-683(13). Participants gave informed consent to participate in this research  
18 prior to taking part. Subject's names were kept on a password-protected database and were  
19 linked only with a study identification number. All the data involved in this study is only  
20 restricted to the use by the investigator.

## 21 **Data availability statement**

22 The data that support the study findings are available from the Ministry of Health Malaysia.  
23 Restrictions apply to the data availability, which was used under license for the current article,  
24 so it is not publicly available. Nevertheless, data are available from the authors upon  
25 reasonable request together with the permission of the Ministry of Health Malaysia.

## 26 **Acknowledgement**

27 Authors wish to thank the Director General of Health, Malaysia for his permission to publish  
28 this article.



- 1  
2  
3 1 *Malaysian J. Public Heal. Med.*, vol. 11, no. 1, pp. 78–85, 2011.
- 4  
5  
6 2 [12] A. S. Zuraida and N. Z. Zainal, “Exploring burnout among Malaysian junior doctors  
7 using the abbreviated Maslach Burnout Inventory,” *Malaysian J. Psychiatry*, vol. 24,  
8 no. 1, pp. 32–41, 2015.
- 9  
10  
11 5 [13] C. S. Siau *et al.*, “Predicting burnout and psychological distress risks of hospital  
12 healthcare workers,” *Malaysian J. Public Heal. Med.*, vol. 2018, no. Specialissue1, pp.  
13 125–136, 2018.
- 14  
15  
16  
17 8 [14] M. P. Christina Maslach, Susan E Jackson, *Maslach burnout inventory*, Third. Palo  
18 Alto, California Consulting Psychologist Press, 1996.
- 19  
20  
21 10 [15] W. S. Chen *et al.*, “Translation, Cross-cultural Adaptation and Validation of the Malay  
22 Version of the Maslach Burnout Inventory (MBI) in Malaysia,” *Int. J. Soc. Sci. Stud.*,  
23 vol. 2, no. 2, pp. 66–74, 2014.
- 24  
25  
26  
27 13 [16] B. Y. Muhamad Saiful, “The Validity of the Malay Brief Cope in Identifying,” *Int. Med.*  
28 *J.*, vol. 18, no. March 2011, pp. 29–33, 2011.
- 29  
30  
31 15 [17] Charles S. Carver, “You want to measure coping but your protocol’s too long:  
32 Consider the brief COPE,” *Int. J. Behav. Med.*, vol. 4, no. 1, pp. 92–100, 1997.
- 33  
34  
35 17 [18] A. Wisetborisut, C. Angkurawaranon, W. Jiraporncharoen, R. Uaphanthasath, and P.  
36 Wiwatanadate, “Shift work and burnout among health care workers,” *Occup. Med.*  
37 *(Chic. Ill.)*, vol. 64, no. 4, pp. 279–286, 2014.
- 38  
39  
40  
41 20 [19] K. Rusca Putra and Setyowati, “Prevalence of burnout syndrome among nurses in  
42 general hospitals in provincial East Java: Cross-sectional study,” *Enferm. Clin.*, vol.  
43 29, no. Insc 2018, pp. 362–366, 2019.
- 44  
45  
46  
47 23 [20] T. Woo, R. Ho, A. Tang, and W. Tam, “Global prevalence of burnout symptoms  
48 among nurses: A systematic review and meta-analysis,” *J. Psychiatr. Res.*, vol. 123,  
49 pp. 9–20, Apr. 2020.
- 50  
51  
52 26 [21] M. C. Das Mercedes *et al.*, “Prevalence and factors associated with burnout syndrome  
53 among primary health care nursing professionals: A cross-sectional study,” *Int. J.*  
54 *Environ. Res. Public Health*, vol. 17, no. 2, 2020.
- 55  
56  
57  
58 29 [22] H. Li, B. Yuan, Q. Meng, and I. Kawachi, “Contextual factors associated with burnout  
59 among Chinese primary care providers: A multilevel analysis,” *Int. J. Environ. Res.*  
60

- 1  
2  
3 1 *Public Health*, vol. 16, no. 19, 2019.
- 4  
5  
6 2 [23] Ministry Of Health Malaysia, "Health Facts 2021," vol. 21, no. November, 2021.
- 7  
8 3 [24] A. Bruyneel, P. Smith, J. Tack, and M. Pirson, "Prevalence of burnout risk and factors  
9 4 associated with burnout risk among ICU nurses during the COVID-19 outbreak in  
10 5 French speaking Belgium," *Intensive Crit. Care Nurs.*, vol. 65, no. xxxx, p. 103059,  
11 6 2021.
- 12  
13  
14  
15 7 [25] L. H. Aiken *et al.*, "Patient safety, satisfaction, and quality of hospital care: Cross  
16 8 sectional surveys of nurses and patients in 12 countries in Europe and the United  
17 9 States," *BMJ*, vol. 344, no. 7851, pp. 1–14, 2012.
- 18  
19  
20  
21 10 [26] E. Yeun and H. Kim, "The Effects of Supervisor Support, Emotional Exhaustion, and  
22 11 Sense of Personal Accomplishment on Hospital Nurse Turnover Intentions," *Indian J.  
23 12 Sci. Technol.*, vol. 8, no. S5, pp. 63–68, Mar. 2015.
- 24  
25  
26  
27 13 [27] L. H. Aiken *et al.*, "Importance of work environments on hospital outcomes in nine  
28 14 countries," *Int. J. Qual. Heal. Care*, vol. 23, no. 4, pp. 357–364, 2011.
- 29  
30  
31 15 [28] L. feng Zhang *et al.*, "The association of Chinese hospital work environment with  
32 16 nurse burnout, job satisfaction, and intention to leave," *Nurs. Outlook*, vol. 62, no. 2,  
33 17 pp. 128–137, 2014.
- 34  
35  
36  
37 18 [29] T. Ahmed, H. Shah, A. Rasheed, and A. Ali, "Burnout among nurses working at Dow  
38 19 and Civil Hospitals in Karachi: A cross-sectional study," *J. Pak. Med. Assoc.*, vol. 70,  
39 20 no. 6, pp. 1018–1022, 2020.
- 40  
41  
42  
43 21 [30] A. Khodadadzadeh, A. Ravari, A. Sayadi, H. Khodadadi, and H. Jafarinaveh,  
44 22 "Occupational burnout assessment among nurses working in Iranian hospital of Ali-  
45 23 ebn Abitaleb, Rafsanjan- Iran," *J. Occup. Heal. Epidemiol.*, vol. 1, no. 2, pp. 103–110,  
46 24 2012.
- 47  
48  
49  
50 25 [31] E. Ayala and A. M. Carnero, "Determinants of Burnout in Acute and Critical Care  
51 26 Military Nursing Personnel: A Cross-Sectional Study from Peru," *PLoS One*, vol. 8,  
52 27 no. 1, 2013.
- 53  
54  
55  
56 28 [32] A. Bartosiewicz and P. Januszewicz, "Readiness of Polish nurses for prescribing and  
57 29 the level of professional burnout," *Int. J. Environ. Res. Public Health*, vol. 16, no. 1,  
58 30 2019.
- 59  
60

- 1  
2  
3 1 [33] S. C. P. S. Silva, M. A. P. Nunes, V. R. Santana, F. P. Reis, J. Machado Neto, and S.  
4 O. Lima, "A síndrome de burnout em profissionais da rede de atenção primária à  
5 2 Saúde de Aracaju, Brasil," *Cienc. e Saude Coletiva*, vol. 20, no. 10, pp. 3011–3020,  
6 3 2015.  
7 4  
8  
9  
10 5 [34] E. Amofo, N. Hanbali, A. Patel, and P. Singh, "What are the significant factors  
11 6 associated with burnout in doctors?," *Occup. Med. (Lond)*., vol. 65, no. 2, pp. 117–  
12 7 121, 2015.  
13  
14  
15  
16 8 [35] L. P. Chou, C. Y. Li, and S. C. Hu, "Job stress and burnout in hospital employees:  
17 9 Comparisons of different medical professions in a regional hospital in Taiwan," *BMJ*  
18 10 *Open*, vol. 4, no. 2, pp. 1–7, 2014.  
19  
20  
21  
22 11 [36] E. Zarei, F. Ahmadi, M. S. Sial, J. Hwang, and P. A. Thu, "Prevalence of Burnout  
23 12 among Primary Health Care Staff and Its Predictors : A Study in Iran," *Int. J. Environ.*  
24 13 *Res. Public Health*, 2019.  
25  
26  
27  
28 14 [37] Y.-H. Lee and M.-H. Lin, "Exploring the Relationship Between Burnout and Job  
29 15 Satisfaction Among Clinical Nurses," *Eur. Sci. J. ESJ*, vol. 15, no. 3, pp. 449–460,  
30 16 2019.  
31  
32  
33 17 [38] F. E. Okwaraji and E. N. Aguwa, "Burnout and psychological distress among nurses in  
34 18 a Nigerian tertiary health institution," *Afr. Health Sci.*, vol. 14, no. 1, pp. 237–245,  
35 19 2014.  
36  
37  
38  
39 20 [39] J. Wang *et al.*, "Prevalence of burnout among intensivists in mainland China: a  
40 21 nationwide cross-sectional survey," *Crit. Care*, vol. 25, no. 1, pp. 1–10, 2021.  
41  
42  
43 22 [40] M. Sofology, M. Efstratopoulou, and T. Dunn, "Predicting Burnout Syndrome in Greek  
44 23 Mental Health Professionals," *J. Soc. Serv. Res.*, vol. 45, no. 1, pp. 142–149, 2019.  
45  
46  
47 24 [41] E. M. de Vasconcelos and M. M. F. De Martino, "Predictors of burnout syndrome in  
48 25 intensive care nurses," *Rev. Gauch. Enferm.*, vol. 38, no. 4, p. e65354, 2018.  
49  
50  
51 26 [42] Z. Ashrafi, H. Ebrahimi, A. Khosravi, A. Navidian, and A. Ghajar, "The Relationship  
52 27 Between Quality of Work Life and Burnout: A Linear Regression Structural-Equation  
53 28 Modeling," *Heal. Scope*, vol. 7, no. 1, pp. 1–7, 2018.  
54  
55  
56 29 [43] G. A. Cañadas-De La Fuente, E. Ortega, L. Ramirez-Baena, E. I. De La Fuente-  
57 30 Solana, C. Vargas, and J. Luis Gómez-Urquiza, "Gender, marital status, and children  
58  
59  
60

- 1  
2  
3 1 as risk factors for burnout in nurses: A meta-analytic study,” *mdpi.com*.
- 4  
5  
6 2 [44] Z. Xie, A. Wang, and B. Chen, “Nurse burnout and its association with occupational  
7 3 stress in a cross-sectional study in Shanghai,” *J. Adv. Nurs.*, vol. 67, no. 7, pp. 1537–  
8 4 1546, 2011.
- 9  
10  
11 5 [45] Y. Yestiana, T. Kurniati, and A. A. A. Hidayat, “Predictors of burnout in nurses working  
12 6 in inpatient rooms at a public hospital in Indonesia,” *Pan Afr. Med. J.*, vol. 33, pp. 1–8,  
13 7 2019.
- 14  
15  
16  
17 8 [46] P. C. Lin *et al.*, “The association between rotating shift work and increased  
18 9 occupational stress in nurses,” *J. Occup. Health*, vol. 57, no. 4, pp. 307–315, 2015.
- 19  
20  
21 10 [47] K. V. Amaral, M. J. Q. Galdino, and J. T. Martins, “Burnout, daytime sleepiness and  
22 11 sleep quality among technical-level Nursing students,” *Rev. Lat. Am. Enfermagem*,  
23 12 vol. 29, 2021.
- 24  
25  
26  
27 13 [48] M. Govindan, P. Keefer, J. Sturza, M. R. Stephens, and N. Malas, “Empowering  
28 14 Residents to Process Distressing Events: A Debriefing Workshop,” *MedEdPORTAL*  
29 15 *J. Teach. Learn. Resour.*, vol. 15, p. 10809, 2019.
- 30  
31  
32  
33 16 [49] J. Maben and J. Bridges, “Covid-19: Supporting nurses’ psychological and mental  
34 17 health,” *J. Clin. Nurs.*, vol. 29, no. 15–16, pp. 2742–2750, 2020.
- 35  
36  
37 18 [50] A. Fathi and R. H. Simamora, “Investigating nurses’ coping strategies in their  
38 19 workplace as an indicator of quality of nurses’ life in Indonesia: A preliminary study,”  
39 20 *IOP Conf. Ser. Earth Environ. Sci.*, vol. 248, no. 1, 2019.
- 40  
41  
42  
43 21 [51] C. Di Monte, S. Monaco, R. Mariani, and M. Di Trani, “From Resilience to Burnout:  
44 22 Psychological Features of Italian General Practitioners During COVID-19  
45 23 Emergency,” *Front. Psychol.*, vol. 11, no. October, 2020.
- 46  
47  
48  
49 24 [52] M. Salman *et al.*, “The psychological effects of COVID-19 on frontline healthcare  
50 25 workers and how they are coping: a web-based, cross-sectional study from Pakistan,”  
51 26 *medRxiv*, p. 2020.06.03.20119867, 2020.
- 52  
53  
54 27 [53] B. Maraqa, Z. Nazzal, and T. Zink, “Palestinian Health Care Workers’ Stress and  
55 28 Stressors During COVID-19 Pandemic: A Cross-Sectional Study,” *J. Prim. Care*  
56 29 *Community Heal.*, vol. 11, 2020.
- 57  
58  
59  
60 30 [54] A. Mattei, F. Fiasca, M. Mazzei, V. Abbossida, and V. Bianchini, “Burnout among

- 1  
2  
3 1 healthcare workers at L'Aquila: its prevalence and associated factors," *Psychol. Heal.*  
4 2 *Med.*, vol. 22, no. 10, pp. 1262–1270, 2017.
- 5  
6  
7 3 [55] A. Shechter *et al.*, "Psychological distress, coping behaviors, and preferences for  
8 4 support among New York healthcare workers during the COVID-19 pandemic," *Gen.*  
9 5 *Hosp. Psychiatry*, vol. 66, no. May, pp. 1–8, 2020.
- 10  
11  
12  
13 6 [56] K. Mctiernan and N. Mcdonald, "Occupational stressors, burnout and coping  
14 7 strategies between hospital and community psychiatric nurses in a Dublin region," *J.*  
15 8 *Psychiatr. Ment. Health Nurs.*, vol. 22, no. 3, pp. 208–218, Apr. 2015.
- 16  
17  
18  
19 9 [57] H. Zhou *et al.*, "Mediating effect of coping styles on the association between  
20 10 psychological capital and psychological distress among Chinese nurses: a cross-  
21 11 sectional study," *J. Psychiatr. Ment. Health Nurs.*, vol. 24, no. 2–3, pp. 114–122, Mar.  
22 12 2017.
- 23  
24  
25  
26 13 [58] H. F. Lee, C. C. Kuo, T. W. Chien, and Y. R. Wang, "A Meta-Analysis of the Effects of  
27 14 Coping Strategies on Reducing Nurse Burnout," *Appl. Nurs. Res.*, 2016.
- 28  
29  
30  
31 15 [59] C. G. Leo *et al.*, "Burnout Among Healthcare Workers in the COVID 19 Era: A Review  
32 16 of the Existing Literature," *Front. Public Heal.*, vol. 9, no. October, pp. 1–6, 2021.
- 33  
34  
35  
36 17 [60] E. D. Browning and J. S. Cruz, "Reflective Debriefing: A Social Work Intervention  
37 18 Addressing Moral Distress among ICU Nurses," *J. Soc. Work End-of-Life Palliat.*  
38 19 *Care*, vol. 14, no. 1, pp. 44–72, 2018.
- 39  
40  
41  
42  
43  
44  
45  
46  
47  
48  
49  
50  
51  
52  
53  
54  
55  
56  
57  
58  
59  
60



# Reporting checklist for cross sectional study.

Based on the STROBE cross sectional guidelines.

## Instructions to authors

Complete this checklist by entering the page numbers from your manuscript where readers will find each of the items listed below.

Your article may not currently address all the items on the checklist. Please modify your text to include the missing information. If you are certain that an item does not apply, please write "n/a" and provide a short explanation.

Upload your completed checklist as an extra file when you submit to a journal.

In your methods section, say that you used the STROBE cross sectional reporting guidelines, and cite them as:

von Elm E, Altman DG, Egger M, Pocock SJ, Gotsche PC, Vandenbroucke JP. The Strengthening the Reporting of Observational Studies in Epidemiology (STROBE) Statement: guidelines for reporting observational studies.

|                           |                     |                                                                                    | Page   |
|---------------------------|---------------------|------------------------------------------------------------------------------------|--------|
|                           | Reporting Item      |                                                                                    | Number |
| <b>Title and abstract</b> |                     |                                                                                    |        |
| Title                     | <a href="#">#1a</a> | Indicate the study's design with a commonly used term in the title or the abstract | 2      |
| Abstract                  | <a href="#">#1b</a> | Provide in the abstract an informative and balanced summary                        | 2      |

of what was done and what was found

## Introduction

|                           |                    |                                                                                      |   |
|---------------------------|--------------------|--------------------------------------------------------------------------------------|---|
| Background /<br>rationale | <a href="#">#2</a> | Explain the scientific background and rationale for the investigation being reported | 4 |
| Objectives                | <a href="#">#3</a> | State specific objectives, including any prespecified hypotheses                     | 4 |

## Methods

|                               |                     |                                                                                                                                                                                                                                                                  |   |
|-------------------------------|---------------------|------------------------------------------------------------------------------------------------------------------------------------------------------------------------------------------------------------------------------------------------------------------|---|
| Study design                  | <a href="#">#4</a>  | Present key elements of study design early in the paper                                                                                                                                                                                                          | 5 |
| Setting                       | <a href="#">#5</a>  | Describe the setting, locations, and relevant dates, including periods of recruitment, exposure, follow-up, and data collection                                                                                                                                  | 5 |
| Eligibility criteria          | <a href="#">#6a</a> | Give the eligibility criteria, and the sources and methods of selection of participants.                                                                                                                                                                         | 5 |
|                               | <a href="#">#7</a>  | Clearly define all outcomes, exposures, predictors, potential confounders, and effect modifiers. Give diagnostic criteria, if applicable                                                                                                                         | 6 |
| Data sources /<br>measurement | <a href="#">#8</a>  | For each variable of interest give sources of data and details of methods of assessment (measurement). Describe comparability of assessment methods if there is more than one group. Give information separately for exposed and unexposed groups if applicable. | 6 |
| Bias                          | <a href="#">#9</a>  | Describe any efforts to address potential sources of bias                                                                                                                                                                                                        | 6 |
| Study size                    | <a href="#">#10</a> | Explain how the study size was arrived at                                                                                                                                                                                                                        | 5 |

|    |                  |                      |                                                                   |     |
|----|------------------|----------------------|-------------------------------------------------------------------|-----|
| 1  | Quantitative     | <a href="#">#11</a>  | Explain how quantitative variables were handled in the            | 6   |
| 2  |                  |                      |                                                                   |     |
| 3  | variables        |                      | analyses. If applicable, describe which groupings were chosen,    |     |
| 4  |                  |                      |                                                                   |     |
| 5  |                  |                      | and why                                                           |     |
| 6  |                  |                      |                                                                   |     |
| 7  |                  |                      |                                                                   |     |
| 8  |                  |                      |                                                                   |     |
| 9  | Statistical      | <a href="#">#12a</a> | Describe all statistical methods, including those used to control | 6   |
| 10 |                  |                      |                                                                   |     |
| 11 | methods          |                      | for confounding                                                   |     |
| 12 |                  |                      |                                                                   |     |
| 13 |                  |                      |                                                                   |     |
| 14 | Statistical      | <a href="#">#12b</a> | Describe any methods used to examine subgroups and                | 6   |
| 15 |                  |                      |                                                                   |     |
| 16 | methods          |                      | interactions                                                      |     |
| 17 |                  |                      |                                                                   |     |
| 18 |                  |                      |                                                                   |     |
| 19 | Statistical      | <a href="#">#12c</a> | Explain how missing data were addressed                           | 6   |
| 20 |                  |                      |                                                                   |     |
| 21 | methods          |                      |                                                                   |     |
| 22 |                  |                      |                                                                   |     |
| 23 |                  |                      |                                                                   |     |
| 24 |                  |                      |                                                                   |     |
| 25 | Statistical      | <a href="#">#12d</a> | If applicable, describe analytical methods taking account of      | 6   |
| 26 |                  |                      |                                                                   |     |
| 27 | methods          |                      | sampling strategy                                                 |     |
| 28 |                  |                      |                                                                   |     |
| 29 |                  |                      |                                                                   |     |
| 30 | Statistical      | <a href="#">#12e</a> | Describe any sensitivity analyses                                 | n/a |
| 31 |                  |                      |                                                                   |     |
| 32 | methods          |                      |                                                                   |     |
| 33 |                  |                      |                                                                   |     |
| 34 |                  |                      |                                                                   |     |
| 35 |                  |                      |                                                                   |     |
| 36 | <b>Results</b>   |                      |                                                                   |     |
| 37 |                  |                      |                                                                   |     |
| 38 |                  |                      |                                                                   |     |
| 39 | Participants     | <a href="#">#13a</a> | Report numbers of individuals at each stage of study—eg           | 7   |
| 40 |                  |                      |                                                                   |     |
| 41 |                  |                      | numbers potentially eligible, examined for eligibility, confirmed |     |
| 42 |                  |                      |                                                                   |     |
| 43 |                  |                      | eligible, included in the study, completing follow-up, and        |     |
| 44 |                  |                      |                                                                   |     |
| 45 |                  |                      | analysed. Give information separately for for exposed and         |     |
| 46 |                  |                      |                                                                   |     |
| 47 |                  |                      | unexposed groups if applicable.                                   |     |
| 48 |                  |                      |                                                                   |     |
| 49 |                  |                      |                                                                   |     |
| 50 |                  |                      |                                                                   |     |
| 51 | Participants     | <a href="#">#13b</a> | Give reasons for non-participation at each stage                  | 7   |
| 52 |                  |                      |                                                                   |     |
| 53 |                  |                      |                                                                   |     |
| 54 | Participants     | <a href="#">#13c</a> | Consider use of a flow diagram                                    | n/a |
| 55 |                  |                      |                                                                   |     |
| 56 |                  |                      |                                                                   |     |
| 57 | Descriptive data | <a href="#">#14a</a> | Give characteristics of study participants (eg demographic,       | 7-9 |
| 58 |                  |                      |                                                                   |     |
| 59 |                  |                      |                                                                   |     |
| 60 |                  |                      |                                                                   |     |

clinical, social) and information on exposures and potential confounders. Give information separately for exposed and unexposed groups if applicable.

|    |                   |                      |                                                                       |
|----|-------------------|----------------------|-----------------------------------------------------------------------|
| 1  |                   |                      |                                                                       |
| 2  |                   |                      |                                                                       |
| 3  |                   |                      |                                                                       |
| 4  |                   |                      |                                                                       |
| 5  |                   |                      |                                                                       |
| 6  |                   |                      |                                                                       |
| 7  |                   |                      |                                                                       |
| 8  | Descriptive data  | <a href="#">#14b</a> | Indicate number of participants with missing data for each 8-9        |
| 9  |                   |                      |                                                                       |
| 10 |                   |                      | variable of interest                                                  |
| 11 |                   |                      |                                                                       |
| 12 |                   |                      |                                                                       |
| 13 | Outcome data      | <a href="#">#15</a>  | Report numbers of outcome events or summary measures. 8-9             |
| 14 |                   |                      |                                                                       |
| 15 |                   |                      |                                                                       |
| 16 |                   |                      | Give information separately for exposed and unexposed                 |
| 17 |                   |                      | groups if applicable.                                                 |
| 18 |                   |                      |                                                                       |
| 19 |                   |                      |                                                                       |
| 20 |                   |                      |                                                                       |
| 21 | Main results      | <a href="#">#16a</a> | Give unadjusted estimates and, if applicable, confounder- 8-9         |
| 22 |                   |                      |                                                                       |
| 23 |                   |                      | adjusted estimates and their precision (eg, 95% confidence            |
| 24 |                   |                      | interval). Make clear which confounders were adjusted for and         |
| 25 |                   |                      | why they were included                                                |
| 26 |                   |                      |                                                                       |
| 27 |                   |                      |                                                                       |
| 28 |                   |                      |                                                                       |
| 29 |                   |                      |                                                                       |
| 30 |                   |                      |                                                                       |
| 31 | Main results      | <a href="#">#16b</a> | Report category boundaries when continuous variables were 8-16        |
| 32 |                   |                      |                                                                       |
| 33 |                   |                      | categorized                                                           |
| 34 |                   |                      |                                                                       |
| 35 |                   |                      |                                                                       |
| 36 | Main results      | <a href="#">#16c</a> | If relevant, consider translating estimates of relative risk into n/a |
| 37 |                   |                      |                                                                       |
| 38 |                   |                      | absolute risk for a meaningful time period                            |
| 39 |                   |                      |                                                                       |
| 40 |                   |                      |                                                                       |
| 41 |                   |                      |                                                                       |
| 42 | Other analyses    | <a href="#">#17</a>  | Report other analyses done—e.g., analyses of subgroups and 8-16       |
| 43 |                   |                      |                                                                       |
| 44 |                   |                      | interactions, and sensitivity analyses                                |
| 45 |                   |                      |                                                                       |
| 46 |                   |                      |                                                                       |
| 47 | <b>Discussion</b> |                      |                                                                       |
| 48 |                   |                      |                                                                       |
| 49 |                   |                      |                                                                       |
| 50 | Key results       | <a href="#">#18</a>  | Summarise key results with reference to study objectives 18-21        |
| 51 |                   |                      |                                                                       |
| 52 |                   |                      |                                                                       |
| 53 | Limitations       | <a href="#">#19</a>  | Discuss limitations of the study, taking into account sources of 21   |
| 54 |                   |                      |                                                                       |
| 55 |                   |                      | potential bias or imprecision. Discuss both direction and             |
| 56 |                   |                      | magnitude of any potential bias.                                      |
| 57 |                   |                      |                                                                       |
| 58 |                   |                      |                                                                       |
| 59 |                   |                      |                                                                       |
| 60 |                   |                      |                                                                       |

1 Interpretation [#20](#) Give a cautious overall interpretation considering objectives, 18-12  
2  
3  
4 limitations, multiplicity of analyses, results from similar studies,  
5  
6 and other relevant evidence.  
7

8  
9 Generalisability [#21](#) Discuss the generalisability (external validity) of the study 21  
10  
11 results  
12  
13

## 14 Other Information

15  
16  
17 Funding [#22](#) Give the source of funding and the role of the funders for the 23  
18  
19 present study and, if applicable, for the original study on which  
20  
21 the present article is based  
22  
23  
24

25 None The STROBE checklist is distributed under the terms of the Creative Commons Attribution  
26  
27 License CC-BY. This checklist can be completed online using <https://www.goodreports.org/>, a tool  
28  
29 made by the [EQUATOR Network](#) in collaboration with [Penelope.ai](#)  
30  
31  
32  
33  
34  
35  
36  
37  
38  
39  
40  
41  
42  
43  
44  
45  
46  
47  
48  
49  
50  
51  
52  
53  
54  
55  
56  
57  
58  
59  
60

# BMJ Open

## Burnout and Coping Strategies among Nurses in Malaysia: A National-level Cross-sectional Study

|                                 |                                                                                                                                                                                                                                                                                                                                                                                                                                                                                 |
|---------------------------------|---------------------------------------------------------------------------------------------------------------------------------------------------------------------------------------------------------------------------------------------------------------------------------------------------------------------------------------------------------------------------------------------------------------------------------------------------------------------------------|
| Journal:                        | <i>BMJ Open</i>                                                                                                                                                                                                                                                                                                                                                                                                                                                                 |
| Manuscript ID                   | bmjopen-2022-064687.R1                                                                                                                                                                                                                                                                                                                                                                                                                                                          |
| Article Type:                   | Original research                                                                                                                                                                                                                                                                                                                                                                                                                                                               |
| Date Submitted by the Author:   | 16-Aug-2022                                                                                                                                                                                                                                                                                                                                                                                                                                                                     |
| Complete List of Authors:       | Binti Zakaria, Nursyahda; Ministry of Health Malaysia, Institute for Health Management, National Institutes of Health<br>Binti Zakaria, Nor Haniza; Ministry of Health Malaysia, Institute for Health Management, National Institutes of Health<br>Bin Abdul Rassip, Muhammad Nur Amir; Institute for Health Management, Centre of Clinical Governance Development<br>Lee, Kun Yun; Ministry of Health Malaysia, Institute for Health Management, National Institutes of Health |
| <b>Primary Subject Heading</b>: | Public health                                                                                                                                                                                                                                                                                                                                                                                                                                                                   |
| Secondary Subject Heading:      | Mental health, Nursing, Health services research                                                                                                                                                                                                                                                                                                                                                                                                                                |
| Keywords:                       | MENTAL HEALTH, Human resource management < HEALTH SERVICES ADMINISTRATION & MANAGEMENT, PUBLIC HEALTH, PRIMARY CARE                                                                                                                                                                                                                                                                                                                                                             |
|                                 |                                                                                                                                                                                                                                                                                                                                                                                                                                                                                 |

SCHOLARONE™  
Manuscripts

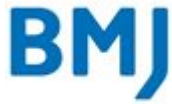

I, the Submitting Author has the right to grant and does grant on behalf of all authors of the Work (as defined in the below author licence), an exclusive licence and/or a non-exclusive licence for contributions from authors who are: i) UK Crown employees; ii) where BMJ has agreed a CC-BY licence shall apply, and/or iii) in accordance with the terms applicable for US Federal Government officers or employees acting as part of their official duties; on a worldwide, perpetual, irrevocable, royalty-free basis to BMJ Publishing Group Ltd ("BMJ") its licensees and where the relevant Journal is co-owned by BMJ to the co-owners of the Journal, to publish the Work in this journal and any other BMJ products and to exploit all rights, as set out in our [licence](#).

The Submitting Author accepts and understands that any supply made under these terms is made by BMJ to the Submitting Author unless you are acting as an employee on behalf of your employer or a postgraduate student of an affiliated institution which is paying any applicable article publishing charge ("APC") for Open Access articles. Where the Submitting Author wishes to make the Work available on an Open Access basis (and intends to pay the relevant APC), the terms of reuse of such Open Access shall be governed by a Creative Commons licence – details of these licences and which [Creative Commons](#) licence will apply to this Work are set out in our licence referred to above.

Other than as permitted in any relevant BMJ Author's Self Archiving Policies, I confirm this Work has not been accepted for publication elsewhere, is not being considered for publication elsewhere and does not duplicate material already published. I confirm all authors consent to publication of this Work and authorise the granting of this licence.

1  
2  
3 1 **Burnout and Coping Strategies among Nurses in Malaysia: A National-level Cross-**  
4 **sectional Study**  
5 2  
6 3

7  
8 4 Nursyahda Z<sup>1</sup>, Nor Haniza Z<sup>1</sup>, Muhammad Nur Amir AR<sup>1</sup>, Lee KY<sup>1</sup>  
9 5

10  
11 6 <sup>1</sup>Institute for Health Management, National Institutes of Health, Ministry of Health Malaysia  
12 7  
13 8  
14 9  
15 10  
16 11  
17 12  
18 13  
19 14  
20 15  
21 16  
22 17  
23 18  
24 19  
25 20  
26 21  
27 22  
28 23  
29 24  
30 25  
31 26  
32 27  
33 28  
34 29  
35 30  
36 31  
37 32  
38 33  
39 34  
40 35  
41 36  
42 37  
43 38  
44 39  
45 40  
46 41  
47 42  
48 43  
49 44  
50 45  
51 46  
52 47  
53 48  
54 49  
55 50  
56 51  
57 52  
58 53  
59 54  
60 55

24 Any inquiry with regards to this article should be directed to the correspondence author:

25 **Dr. Muhammad Nur Amir Bin Abdul Rassip, M.D. (MPM 46977)**

26 Research Medical Officer UD 48

27 Institute for Health Management, Ministry of Health Malaysia

28 Block B1, National Institutes of Health (NIH) Complex

29 No.1, Jalan Setia Murni U13/52

30 Section U13 Setia Alam

31 40170 Shah Alam, SELANGOR, MALAYSIA

32 Tel:03-336287400 ext:8313 / Fax:03-33627401

33 Email: nur.amir@moh.gov.my

34 ORCID iD: <https://orcid.org/0000-0002-8162-1380>



1  
2  
3 1 **Burnout and Coping Strategies among Nurses in Malaysia: A National-level Cross-**  
4 **Sectional Study**  
5 2  
6 3  
7  
8

9 4 **ABSTRACT**

10 5 **Objective:** This national-level study aimed to determine the prevalence and risk factors of  
11 6 burnout, as well as the coping strategies among nurses in the Ministry of Health (MOH)  
12 7 Malaysia.

13  
14  
15  
16 8 **Design:** Using a complex sampling design, a two-stage stratified cluster sampling was  
17 9 performed to recruit MOH nurses between August and November 2019.

18  
19  
20 10 **Setting and Participants:** A total of 2428 nurses from 32 hospitals and 28 district health  
21 11 offices answered the questionnaires based on Maslach Burnout Inventory for Human Services  
22 12 (MBI-HSS) and Brief COPE. Complex sampling analysis was applied.

23  
24  
25  
26 13 **Outcome measures:** The outcome of interest was the prevalence of burnout and its three  
27 14 domains of emotional exhaustion (EE), depersonalisation (DP), and low personal  
28 15 accomplishment (PA). Odds ratios (OR) using 95% confidence intervals (CI) were calculated.  
29 16 Significant factors at the univariate level were entered into the multivariate logistic regression  
30 17 to identify independent predictors of burnout.

31  
32  
33  
34  
35 18 **Results:** One in four (24.4%) nurses experienced burnout. Younger, single, and childless  
36 19 nurses had a higher prevalence of burnout. Shift working nurses were 1.6 times more likely to  
37 20 develop burnout. Those who performed >6 night shifts per month were 1.5 times more  
38 21 predisposed to burnout (95% CI: 1.01, 2.36;  $p < 0.05$ ). While encountering traumatic events at  
39 22 work led to 4.2 times (95% CI: 2.31, 7.63;  $p < 0.05$ ) higher risk of burnout, those who received  
40 23 post-traumatic psychological support were better protected. The use of dysfunctional coping  
41 24 strategies was detrimental as it was positively correlated with EE and DP.

42  
43  
44  
45  
46  
47 25 **Conclusion:** Addressing modifiable stressors of burnout at individual and institutional levels  
48 26 identified in this study can be potentially beneficial in reducing burnout and its undesirable  
49 27 effects among nurses. Interventions that promote positive coping strategies should be  
50 28 implemented. Organisational-driven efforts must target the improvement of work schedules  
51 29 for nurses and the establishment of a structured debriefing service for post-trauma counselling.

52  
53  
54  
55  
56 30 **Keywords:** Burnout, nurse, primary care, hospital, Malaysia, COPE, MBI  
57  
58  
59  
60

## Strength and Limitations of this Study

- National-level study with a prominent sample size representative of the nursing population from both primary care and hospital settings in the public healthcare sector of a developing nation.
- The use of Maslach Burnout Inventory for Human Services (MBI-HSS) and Brief COPE, two internationally-used tools facilitates the comparison of burnout and coping strategies with other studies in the literature.
- Complex sampling analysis improves the precision of sample estimates by ensuring nursing populations from multiple stages of sampling have an equal probability of being in the sample.
- Causal relationships cannot be derived from the cross-sectional analysis as the exposure and outcome were assessed at the same time.
- Potential recall bias and social desirability bias from self-administered questionnaires.

## 1 Introduction

2  
3  
4  
5  
6  
7  
8  
9  
10  
11  
12  
13  
14  
15  
16  
17  
18  
19  
20  
21  
22  
23  
24  
25  
26  
27  
28  
29  
30  
31  
32  
33  
34  
35  
36  
37  
38  
39  
40  
41  
42  
43  
44  
45  
46  
47  
48  
49  
50  
51  
52  
53  
54  
55  
56  
57  
58  
59  
60

The concept of burnout was first described by Freudenberger as a syndrome of exhaustion of psychological and physical resources that commonly inflicts teachers, healthcare professionals, and social workers [1]. In 2019, under the 11th Revision of the International Classification of Diseases (ICD-11), burnout was categorised as an occupational phenomenon [2] resulting from chronic workplace stress that has not been successfully managed. The burnout syndrome encompasses three dimensions, namely emotional exhaustion (EE: feelings of energy depletion), depersonalisation (DP: increased mental distance from one's job), and personal accomplishment (PA: reduced professional efficacy) [3]. Coping strategies, when applied appropriately in a timely manner, can reduce or even prevent the onset of burnout. The importance of instilling positive coping strategies has been emphasised in relevant burnout literature.

Globally, the prevalence of burnout in the health sector has been extensively studied due to its close linkage with the wellbeing and productivity of healthcare workers (HCW) [4]. As early as 2013, a systematic review reported a burnout prevalence of 22-40% among nurses in ten European countries [5]. Recent studies reported that burnout and poor mental wellbeing among HCWs can lead to higher absenteeism and turnover rates. In addition to the significant financial costs from brain drain, burnout is also associated with increased adverse events and poorer patient satisfaction, subsequently leading to poorer quality of patient care [6–9].

The healthcare sector in Malaysia is a public-private dichotomous system. The public healthcare system under the Ministry of Health (MOH) is the main healthcare service provider. Nurses represent the backbone of the healthcare workforce in the MOH facilities. With an increasing workload, the nursing work environment is becoming more demanding and challenging, thus predisposing nurses to burnout. To date, the majority of burnout-related studies in Malaysia were single-centred, hospital-based, or focused solely on medical doctors [10–12]. As the primary gatekeepers of MOH facilities, nurses are often the first line of contact with the general public. To ensure that nurses can function optimally in a healthy working environment to ensure patients' wellbeing, it is imperative to investigate the extent of the burnout phenomenon among them. By identifying the predisposing factors and the commonly practised coping strategies among the at-risk nurses, the necessary mitigation measures can be put in place.

1  
2  
3 1 In view of the scarcity of national-level data, this study aimed to determine the prevalence  
4 2 of burnout syndrome among nurses in MOH facilities in Malaysia as well as its association  
5 3 with the relevant sociodemographic and professional characteristics using the data from a  
6 4 national survey conducted in 2019, right before the COVID-19 pandemic. We also examined  
7 5 coping strategies used by nurses in dealing with stressful conditions at work. Our findings can  
8 6 provide vital baseline information on burnout among nurses during the pre-pandemic era in  
9 7 the attempt to guide the planning and implementation of preventive actions, especially  
10 8 following the immeasurable workload and occupational burden brought on by the COVID-19  
11 9 pandemic.  
12 10

## 11 **Material and Methods**

12

13 A national-level cross-sectional study was conducted from September to December 2019  
14 14 among the nurses working in the hospital and primary settings under the Ministry of Health  
15 15 (MOH) Malaysia. Complex sampling was applied to obtain a nationally representative  
16 16 population of nurses. A total of 2516 nurses from both the hospital and primary care settings  
17 17 were selected using a multistage stratified random sampling. Those who were on leaves of  
18 18 absence and with underlying psychiatric illness were excluded.  
19

20 The sample size was calculated based on a single proportion for prevalence  
21 21 estimation. Based on a 27.3% estimated prevalence of burnout [13], a design effect of 2.5,  
22 22 and a non-response rate of 20%, the sample size required for a single data analysis was 953.  
23 23 However, as this consisted of two main groups of nurses from primary care and hospital  
24 24 settings, the sample size was multiplied by two and became 1906. Based on the latest  
25 25 workforce distribution data by the MOH Nursing Board, the proportion of nurses working in  
26 26 hospital and primary care settings were 82% and 18% respectively. Thus, the sample size  
27 27 required from hospitals was 1563 (1906\*82%). However, due to the low sample size on the  
28 28 primary care side (1906\*18%=343), it was adjusted to 953, the minimum sample size. Thus,  
29 29 the total sample size required for the study was 2516.  
30

31 After that, a two-stage stratified cluster sampling was performed to select one state  
32 32 from each of the six zones in Malaysia, followed by the secondary stratum that was made up  
33 33 of 32 hospitals and 28 DHOs selected randomly from the six states in the primary stratum.  
34 34 Allocation of the sample to each state in Malaysia was done proportionately to the population  
35 35 size of nurses working in each state. The respondents were then randomly chosen from a list  
36 36 of nurses obtained from the liaison officers at each facility. A briefing was given to them to

1  
2  
3 1 explain the study objectives to the respondents and to highlight that their participation would  
4 2 be voluntary. Strict confidentiality was maintained and no identifier was used in the  
5 3 questionnaire. The participants were required to provide written informed consent before filling  
6 4 up the self-administered questionnaire. Completed questionnaires were returned to the  
7 5 investigators during the same session.  
8  
9  
10  
11  
12

13 7 The questionnaire was prepared in dual languages of English and Malay (the national  
14 8 language of Malaysia). The first section of the questionnaire extracted information on the  
15 9 sociodemographic and professional characteristics of the nurses such as independent  
16 10 variables, namely age, gender, marital status, number of children, and household income.  
17 11 Based on the Malaysian Department of Statistics (DOSM) Household Income and Basic  
18 12 Amenities Survey 2019, household income categories in Malaysia were categorised as B40,  
19 13 M40, and T20; representing the bottom 40% (less than MYR 4,360), middle 40% (MYR 4,361-  
20 14 MYR 9,619), and the top 20% of income earners (more than MYR 9,620) [14].  
21  
22  
23  
24  
25  
26

27 16 In the next section, the Maslach Burnout Inventory for Human Services (MBI-HSS)  
28 17 was used to measure burnout syndrome among nurses. It comprises 22 items under three  
29 18 domains: EE (nine items), DP (five items), and PA (eight items). All items are rated on a seven-  
30 19 point Likert scale from zero (never), one (few times a year), two (once a month), three (a few  
31 20 times a month), four (once a week), five (a few times a week), to six (every day). The total  
32 21 values from each domain were summed up. The cut-off scores for EE, DP, and PA  
33 22 are >27, >13, and <32 respectively. In this study, the operational definition of burnout followed  
34 23 the description whereby a nurse would be considered burned out if he or she scored high on  
35 24 the dimensions of EE, DP, or both [15]. The translated version of MBI-HSS in the Malay  
36 25 language showed an overall Cronbach's alpha of 0.803, indicating a good internal consistency,  
37 26 thus making it culturally acceptable to be used in Malaysia [16].  
38  
39  
40  
41  
42  
43  
44  
45

46 28 The Malay version [17] of the Brief COPE [18] was used to measure strategies used  
47 29 for coping with stress. The questionnaire is made up of 28 items grouped into 14 subscales  
48 30 measuring three coping strategies: dysfunctional (venting, denial, substance use, behavioural  
49 31 disengagement, self-distraction, self-blame), problem-focused (active coping, planning, use  
50 32 of instrumental support), emotion-focused (use of emotional support, positive reframing,  
51 33 acceptance, religion, humour).  
52  
53  
54  
55  
56

57 35 The data were analysed using Statistical Package for the Social Science (SPSS  
58 36 version 22). The levels of overall burnout and its three domains (EE, DP, and PA) were the  
59 37 outcomes of interest in this study. Following complex sampling analysis procedures, the  
60

prevalence of burnout was calculated using sample weights and compared among all nurses under the MOH facilities in Malaysia. Sample weightage was carried out to allow references from persons included in the sample to the populations from which they were drawn. It was to allow unbiased estimates, taking account into the fact that all persons in the population would not have the same probability of selection. Odds ratios (OR) using 95% confidence intervals (CI) were calculated for categorical variables. Significant factors with a p-value <0.25 at the univariate level were entered into the multivariate logistic regression to identify independent predictors of burnout. The correlation matrix showed no sign of pairwise collinearity as all correlation coefficients were below 0.7. On top of that, all the variables met the assumption of collinearity (Tolerance <1, *VIF* <5). Therefore, multicollinearity was not a concern.

## Patient and Public Involvement

Patients and/or the public were not involved in the design, or conduct, or reporting, or dissemination plans of this research.

## Results

A total of 2428 nurses participated in the survey, giving a response rate of 93.9%. After data cleaning, responses from 2418 nurses were included in the final analysis. Table 1 shows the baseline characteristics of respondents. The majority of them were married (83.7%), had one to three children (59.2%), and between 31 to 40 years old (42.7%). More than half of the respondents (51.9%) had a diploma and had worked for more than 10 years (55.3%). Approximately two-thirds of the nurses (67.3%) spent more than half of their working hours performing direct clinical care on patients. As high as 63.1% of the respondents had to perform on-call or extended hour duties beyond normal working hours more than three times a month.

Table 1: Baseline Characteristics of the Nurses

|                          | Variables     | N    | %          |
|--------------------------|---------------|------|------------|
| <b>Age</b>               | Mean age (SD) |      | 36.9 (8.1) |
| <b>Age group (years)</b> | 21- 30        | 638  | 26.4       |
|                          | 31- 40        | 1033 | 42.7       |
|                          | > 40          | 747  | 30.9       |
| <b>Marital status</b>    | Single        | 395  | 16.3       |
|                          | Married       | 2023 | 83.7       |
| <b>No. of children</b>   | No child      | 502  | 20.9       |
|                          | 1 - 3 child   | 1419 | 59.2       |
|                          | > 3 child     | 475  | 19.9       |
| <b>Education level</b>   | Certificate   | 569  | 23.6       |

|                                                                             |                  |      |      |
|-----------------------------------------------------------------------------|------------------|------|------|
|                                                                             | Diploma          | 1720 | 71.2 |
|                                                                             | Degree and above | 126  | 5.2  |
| <b>Household income</b>                                                     | B40              | 788  | 37.0 |
|                                                                             | M40              | 1173 | 55.0 |
|                                                                             | T20              | 171  | 8.0  |
| <b>Level of healthcare</b>                                                  | Hospital         | 1524 | 63.0 |
|                                                                             | Primary Care     | 894  | 37.0 |
| <b>Year of service (years)</b>                                              | 1 - 5            | 435  | 18.2 |
|                                                                             | 6 -10            | 635  | 26.5 |
|                                                                             | > 10             | 1322 | 55.3 |
| <b>Time spent on clinical activities</b>                                    | > 50 %           | 1547 | 67.2 |
|                                                                             | < 50 %           | 756  | 32.8 |
| <b>Shift work</b>                                                           | Yes              | 1056 | 44.6 |
|                                                                             | No               | 1311 | 55.4 |
| <b>Total number of shifts per month</b>                                     | > 24X            | 544  | 49.8 |
|                                                                             | < 24 X           | 549  | 50.3 |
| <b>Number of night shifts per month (evening + night)</b>                   | > 6 x            | 409  | 40.7 |
|                                                                             | 1 -6 X           | 596  | 59.3 |
| <b>Number of double shifts per month</b>                                    | > 5x             | 103  | 25.9 |
|                                                                             | 1 - 4x           | 294  | 74.1 |
| <b>Number of on calls/ extended hours per month</b>                         | 1 – 3 x          | 324  | 36.9 |
|                                                                             | 4 – 6 x          | 217  | 24.7 |
|                                                                             | > 7 x            | 338  | 38.4 |
| <b>Sleeping hours</b>                                                       | <6 hours         | 673  | 28.8 |
|                                                                             | 6-7 hours        | 1305 | 55.9 |
|                                                                             | >7 hours         | 358  | 15.3 |
| <b>Encountered traumatic events at work</b>                                 | Yes              | 667  | 27.7 |
|                                                                             | No               | 1737 | 72.3 |
| <b>Received debriefing/ psychological support for post-traumatic events</b> | Yes              | 189  | 28.8 |
|                                                                             | No               | 468  | 71.2 |
| <b>Travelling time to the workplace</b>                                     | >30 minutes      | 444  | 18.5 |
|                                                                             | 16-30 minutes    | 817  | 34.1 |
|                                                                             | <15 minutes      | 1138 | 47.4 |

Table 2 summarises the prevalence of burnout based on baseline characteristics. Based on the results, approximately one in every four nurses (24.4%, 95% CI: 17.7, 32.6) suffered from burnout syndrome with high scores in EE, DP, or both. The MBI score showed that 41.6% (95% CI 35.5, 48.0) of the nurses suffered from low PA, followed by 23.9% (95% CI 17.3, 32.1) with high EE, and 4.5% (95% CI 2.2, 9.1) with high DP. Younger age group (35.8, 95% CI: 28.3, 44.0), single (29.1, 95% CI: 13.2, 52.5) and childless (35.3, 95% CI: 30.1, 40.8) nurses recorded a higher prevalence of burnout. Burnout level was the lowest among nurses from M40 households (29.5, 95% CI: 20.7, 40.1) as compared to B40 and T20 groups. Hospital nurses reported a higher level of burnout than their counterparts in primary care facilities. Furthermore, nurses who were less involved in clinical activities experienced a higher level of burnout (28.2, 95% CI: 22.1, 35.3). Shift work and after-office hour duties also led to

1 a higher prevalence of burnout. Our study showed a 7% higher prevalence of burnout among  
2 nurses who performed shift work [Shift workers: 27.1% (95% CI: 18.2, 38.3), Non-shift workers:  
3 20.7% (95% CI: 15.5, 27.1)]. In addition, nurses who performed on calls or extended hours  
4 more than seven times a month reported a h prevalence of burnout (24.4, 95% CI: 17.1, 33.7).  
5 Among those who experienced a traumatic event at work, 39.9% (95% CI: 29.9, 50.8) suffered  
6 from burnout. A higher prevalence of burnout (36.8%) was observed among nurses who did  
7 not receive any debriefing post-traumatic events (95% CI: 24.1, 51.7).

For peer review only



1  
2  
3 1 Table 2: Prevalence of Burnout and the domains of Emotional Exhaustion, Depersonalisation,  
4 and Low Personal Accomplishment among Nurses by Sociodemographic and Professional  
5 2  
6 3 Characteristics  
7

| Prevalence Rate                          | Overall Burnout<br>(95% CI) | High EE<br>(95% CI)  | High DP<br>(95% CI) | Low PA<br>(95% CI)   |
|------------------------------------------|-----------------------------|----------------------|---------------------|----------------------|
| <b>Overall nurses</b>                    | 24.4<br>(17.7, 32.6)        | 23.9<br>17.3, 32.1   | 4.5<br>(2.2, 9.1)   | 41.6<br>(35.4, 48.1) |
| <b>Age Group (years)</b>                 |                             |                      |                     |                      |
| 21- 30                                   | 35.8<br>(28.3, 44.0)        | 35.3<br>(28.3, 42.9) | 8.3<br>(4.8, 13.9)  | 48.0<br>(41.0, 55.0) |
| 31- 40                                   | 24.2<br>(17.5, 32.4)        | 23.4<br>(17.1, 31.0) | 4.4<br>(2.1,9.2)    | 40.5<br>(34.3, 47.1) |
| > 40                                     | 15.5<br>(7.5, 29.3)         | 15.3<br>(7.4,29.1)   | 1.6<br>(0.5, 4.8)   | 37.6<br>(26.6, 50.1) |
| <b>Marital status</b>                    |                             |                      |                     |                      |
| Single                                   | 29.1<br>(13.2, 52.5)        | 28.9<br>(13.2, 52.0) | 6.7<br>(2.5, 17.0)  | 59.7<br>(36.7, 79.2) |
| Married                                  | 23.4<br>(18.4, 29.4)        | 22.9<br>(17.8, 28.8) | 4.1<br>(1.7, 9.3)   | 37.9<br>(30.7, 45.6) |
| <b>No. of children</b>                   |                             |                      |                     |                      |
| No child                                 | 35.3<br>(30.1, 40.8)        | 35.1<br>(30.1, 40.4) | 7.0<br>(4.0, 12.1)  | 49.2<br>(38.8, 59.8) |
| 1 - 3 child                              | 24.7<br>(17.9, 33.2)        | 24.1<br>(17.3, 32.5) | 4.8<br>(1.9, 12.0)  | 44.6<br>(33.3, 56.6) |
| > 3 child                                | 14.0<br>(9.3, 20.5)         | 13.5<br>(9.1, 19.7)  | 1.5<br>(0.8, 3.0)   | 27.2<br>(14.8, 44.6) |
| <b>Education level</b>                   |                             |                      |                     |                      |
| Certificate                              | 15.6<br>(9.9, 23.7)         | 15.2<br>(9.6, 23.1)  | 2.1<br>(0.7, 5.9)   | 48.9<br>(29.6, 68.6) |
| Diploma                                  | 26.0<br>(19.3, 34.0)        | 25.5<br>(18.7, 33.6) | 5.1<br>(2.5, 9.9)   | 40.0<br>(32.6, 47.9) |
| Degree and above                         | 35.9<br>(24.5, 49.0)        | 35.9<br>(24.6, 49.0) | 5.1<br>(1.7, 14.7)  | 37.1<br>(23.8, 52.7) |
| <b>Household income</b>                  |                             |                      |                     |                      |
| B40                                      | 29.5<br>(20.7, 40.1)        | 29.0<br>(20.7, 39.0) | 6.5<br>(3.2, 12.8)  | 44.5<br>(36.8, 52.4) |
| M40                                      | 22.3<br>(16.2, 29.9)        | 21.7<br>(15.5, 29.6) | 3.8<br>(1.6, 8.4)   | 35.5<br>(27.0, 45.0) |
| T20                                      | 28.6<br>(15.3, 47.0)        | 28.6<br>(15.3, 47.0) | 1.8<br>(0.6, 5.2)   | 32.6<br>(22.9, 44.1) |
| <b>Level of healthcare</b>               |                             |                      |                     |                      |
| Hospital                                 | 25.8<br>(16.6, 37.7)        | 25.2<br>(16.2, 37.1) | 5.0<br>(2.1, 11.6)  | 45.3<br>(41.3, 49.3) |
| Primary Care                             | 19.3<br>(14.4, 25.3)        | 18.9<br>(13.8, 25.4) | 2.7<br>(1.6, 4.7)   | 27.9<br>(21.0, 35.9) |
| <b>Year of service</b>                   |                             |                      |                     |                      |
| 1 - 5                                    | 34.2<br>(22.9, 47.7)        | 33.4<br>(22.9, 45.8) | 8.7<br>(4.3, 16.7)  | 48.3<br>(38.3, 58.4) |
| 6 -10                                    | 29.5<br>(22.5, 37.6)        | 28.8<br>(22.1,36.5)  | 5.7<br>(2.4, 12.8)  | 41.4<br>(34.1, 49.1) |
| > 10                                     | 19.8<br>(15.1, 25.4)        | 19.5<br>(14.9, 25.0) | 2.7<br>(1.4, 5.2)   | 42.2<br>(29.7, 55.9) |
| <b>Time spent on clinical activities</b> |                             |                      |                     |                      |
| > 50 %                                   | 22.5<br>(15.2, 32.1)        | 21.9<br>(14.6, 31.6) | 4.5<br>(2.4, 8.3)   | 41.2<br>(34.3, 48.7) |
| < 50 %                                   | 28.2<br>(22.1, 35.3)        | 27.9<br>(22.1, 34.5) | 4.6<br>(1.5, 13.1)  | 41.7<br>(33.5, 50.5) |
| <b>Shift work</b>                        |                             |                      |                     |                      |
| No                                       | 20.7<br>(15.5, 27.1)        | 19.9<br>(14.3, 26.9) | 3.7<br>(1.9, 7.3)   | 40.2<br>(22.7, 60.6) |
| Yes                                      | 27.1<br>(18.2, 8.3)         | 26.8<br>(18.1, 37.8) | 5.1<br>(2.3, 11.0)  | 42.2<br>(31.9, 53.3) |
| <b>Total number of shifts per month</b>  |                             |                      |                     |                      |

| Prevalence Rate                                                            | Overall Burnout<br>(95% CI) | High EE<br>(95% CI)  | High DP<br>(95% CI) | Low PA<br>(95% CI)   |
|----------------------------------------------------------------------------|-----------------------------|----------------------|---------------------|----------------------|
| > 24X                                                                      | 27.2<br>(15.4, 43.5)        | 26.9<br>(15.3, 42.8) | 3.2<br>(0.8, 11.7)  | 34.3<br>(18.9, 53.8) |
| < 24 X                                                                     | 27.5<br>(19.5, 37.1)        | 27.3<br>(19.3, 37.0) | 7.1<br>(3.7, 13.5)  | 50.9<br>(43.3, 58.4) |
| <b>Total number of night shifts per month</b>                              |                             |                      |                     |                      |
| > 6x                                                                       | 33.9<br>(23.6, 46.1)        | 33.8<br>(23.5, 46.0) | 8.2<br>(4.4, 14.9)  | 44.6<br>(38.3, 51.1) |
| 1 - 6x                                                                     | 22.9<br>(14.8, 33.6)        | 22.5<br>(14.7, 32.9) | 2.9<br>(0.7, 11.6)  | 40.2<br>(27.9, 54.0) |
| <b>Total number of double shifts per month</b>                             |                             |                      |                     |                      |
| > 5x                                                                       | 35.5<br>(24.0, 48.8)        | 35.5<br>(24.0, 48.8) | 9.4<br>(3.3, 24.4)  | 41.2<br>(18.0, 69.0) |
| 1 - 4x                                                                     | 32.3<br>(22.3, 44.2)        | 31.7<br>(22.1, 43.2) | 7.2<br>(3.7, 13.7)  | 43.4<br>(33.3, 54.1) |
| <b>Total number of on-call / extended hours per month</b>                  |                             |                      |                     |                      |
| 1 – 3 x                                                                    | 18.0<br>(7.8, 36.0)         | 16.6<br>(6.0, 38.4)  | 2.6<br>(0.8, 8.4)   | 49.7<br>(19.6, 79.9) |
| 4 – 6 x                                                                    | 20.3<br>(14.1, 28.4)        | 20.3<br>(14.1, 28.4) | 5.8<br>(2.5, 12.7)  | 28.2<br>(13.9, 49.0) |
| > 7 x                                                                      | 24.4<br>(17.1, 33.7)        | 23.5<br>(16.3, 32.6) | 3.1<br>(1.2, 7.5)   | 31.2<br>(20.5, 44.5) |
| <b>Sleeping hours</b>                                                      |                             |                      |                     |                      |
| <6 hours                                                                   | 35.7<br>(29.7, 42.2)        | 35.5<br>(29.6, 41.8) | 7.5<br>(4.8, 11.6)  | 44.7<br>(36.3, 53.4) |
| 6-7 hours                                                                  | 20.7<br>(13.2, 31.0)        | 20.0<br>(12.6, 30.3) | 3.6<br>(1.3, 9.1)   | 42.0<br>(35.9, 48.4) |
| >7 hours                                                                   | 17.0<br>(12.8, 22.1)        | 16.5<br>(12.2, 22.0) | 2.9<br>(0.9, 9.5)   | 35.4<br>(21.6, 52.2) |
| <b>Encountered traumatic events at work</b>                                |                             |                      |                     |                      |
| Yes                                                                        | 39.9<br>(29.9, 50.8)        | 38.9<br>(28.4, 50.5) | 9.7<br>(7.7, 12.2)  | 43.9<br>(31.7, 56.9) |
| No                                                                         | 18.5<br>(12.8, 26.0)        | 18.2<br>(12.7, 25.5) | 2.5<br>(0.6, 9.4)   | 40.8<br>(32.1, 50.1) |
| <b>Received debriefing/psychological support for post- traumatic event</b> |                             |                      |                     |                      |
| Yes                                                                        | 19.5<br>(7.3, 42.8)         | 19.8<br>(6.8, 45.7)  | 3.6<br>(1.1, 11.3)  | 33.4<br>(11.2, 55.5) |
| No                                                                         | 36.8<br>(24.1, 51.7)        | 49.6<br>(40.0, 59.2) | 13.3<br>(8.2, 20.8) | 50.0<br>(39.1, 60.9) |
| <b>Travelling time to the workplace</b>                                    |                             |                      |                     |                      |
| >30 minutes                                                                | 30.6<br>(17.5, 47.8)        | 29.9<br>(17.1, 46.8) | 5.5<br>(2.1, 13.6)  | 59.9<br>(40.9, 76.4) |
| 16-30 minutes                                                              | 25.0<br>(16.1, 36.9)        | 24.7<br>(16.1, 35.9) | 5.4<br>(2.2, 12.7)  | 42.2<br>(30.2, 55.2) |
| <15 minutes                                                                | 21.7<br>(16.8, 27.5)        | 21.1<br>(15.9, 27.6) | 3.5<br>(1.7, 7.0)   | 34.3<br>(27.9, 41.5) |

Based on the results, problem-focused coping strategies were positively related to the PA domain in MBI. An increase of one-point in the scores of active coping and planning led to a 2.4 and 2.6 points increase in the score of PA. In contrast, dysfunctional coping strategies were negatively related to PA. A one-point increase in the score of substance use, self-blame, and behavioural disengagement resulted in 1.1, 1.6, and 2.0 points reduction in the PA score. Most of the significant predictors that led to higher EE scores under the domains of EE and DP were dysfunctional coping strategies (Table 3).

1 Table 3: Influences of different coping strategies on domains of emotional exhaustion,  
 2 depersonalisation, and personal accomplishment under burnout syndrome through analysis  
 3 of the slope of the regression line  
 4

| Coping strategies<br>(Brief COPE) | Emotional exhaustion<br><i>B</i> ( <i>r</i> <sup>2</sup> ) | Depersonalisation<br><i>B</i> ( <i>r</i> <sup>2</sup> ) | Personal accomplishment<br><i>B</i> ( <i>r</i> <sup>2</sup> ) |
|-----------------------------------|------------------------------------------------------------|---------------------------------------------------------|---------------------------------------------------------------|
| <b>Problem-focused</b>            |                                                            |                                                         |                                                               |
| Active coping                     | 1.041 (0.02)                                               | -0.032 (0.00)                                           | 2.418 (0.17)**                                                |
| Planning                          | 0.562 (0.00)                                               | -0.083 (0.00)                                           | 2.557 (0.18)**                                                |
| Use of instrumental support       | 1.408 (0.04)                                               | 0.269 (0.01)                                            | 0.614 (0.01)                                                  |
| <b>Emotion-focused</b>            |                                                            |                                                         |                                                               |
| Use of emotional support          | 1.803 (0.07)*                                              | 0.331 (0.02)**                                          | 0.737 (0.02)                                                  |
| Positive reframing                | 0.385 (0.00)                                               | -0.218 (0.01)                                           | 2.224 (0.13)**                                                |
| Acceptance                        | 1.500 (0.04)                                               | 0.237 (0.01)                                            | 1.570 (0.09)                                                  |
| Religion                          | -0.470 (0.00)                                              | -0.290 (0.01)*                                          | 1.381 (0.04)**                                                |
| Humour                            | 2.455 (0.07)**                                             | 0.843 (0.07)***                                         | -0.436 (0.00)                                                 |
| <b>Dysfunctional</b>              |                                                            |                                                         |                                                               |
| Venting                           | 3.771 (0.18)**                                             | 0.944 (0.09)**                                          | -0.812 (0.02)                                                 |
| Denial                            | 1.807 (0.04)                                               | 0.938 (0.09)***                                         | -1.124 (0.00)                                                 |
| Substance use                     | 2.652 (0.01)**                                             | 0.973 (0.01)*                                           | -1.127 (0.00)*                                                |
| Behavioural disengagement         | 4.350 (0.18)***                                            | 1.293 (0.13)***                                         | -2.000 (0.07)***                                              |
| Self-distraction                  | 2.428 (0.13)**                                             | 0.396 (0.03)**                                          | 0.885 (0.03)                                                  |
| Self-blame                        | 1.702 (0.04)                                               | 0.698 (0.06)*                                           | -1.602 (0.07)**                                               |

5 \**p* < 0.05; \*\* *p* < 0.01; \*\*\* *p* < 0.001

6 *B* denotes  $\beta$ -coefficient, *r*<sup>2</sup> denotes the coefficient of determination

7  
 8 Table 4 shows the association between baseline variables and the risk of burnout  
 9 using univariate logistic regression. Age group, number of children, education level, and years  
 10 of service were closely associated with the development of burnout and its subdomains. A  
 11 higher number of shifts, double shifts, and night shifts per month, as well as sleep deprivation  
 12 (< 6 hours per night), were significantly associated with burnout (*p* < 0.05).  
 13

1 Table 4: Association between demographic and professional characteristics with burnout  
 2 using univariate logistic regression

|                                               | Burnout               |                  | High EE               |                  | High DP                |                  | Low PA                |                  |
|-----------------------------------------------|-----------------------|------------------|-----------------------|------------------|------------------------|------------------|-----------------------|------------------|
|                                               | Crude OR<br>(95% CI)  | p-value          | Crude OR<br>(95% CI)  | p-value          | Crude OR<br>(95% CI)   | p-value          | Crude OR<br>(95% CI)  | p-value          |
| <b>Age Group (years)</b>                      |                       |                  |                       |                  |                        |                  |                       |                  |
| 21- 30                                        | 3.04<br>(1.45 - 6.38) | <b>0.010</b>     | 3.02<br>(1.44 - 6.35) | <b>0.011</b>     | 5.67<br>(2.74 - 11.71) | <b>0.001</b>     | 1.53<br>(0.88 - 2.64) | 0.108            |
| 31- 40                                        | 1.74<br>(0.66 - 4.60) | 0.211            | 1.69<br>(0.67 - 4.27) | 0.217            | 2.91<br>(1.15 - 7.39)  | <b>0.031</b>     | 1.13<br>(0.62 - 2.04) | 0.634            |
| > 40                                          | 1                     |                  | 1                     |                  | 1                      |                  | 1                     |                  |
| <b>Marital Status</b>                         |                       |                  |                       |                  |                        |                  |                       |                  |
| Single                                        | 1.34<br>(0.60 - 2.98) | 0.402            | 1.37<br>(0.64 - 2.96) | 0.355            | 1.69<br>(0.46 - 6.21)  | 0.359            | 2.43<br>(0.79 - 7.50) | 0.102            |
| Married                                       | 1                     |                  | 1                     |                  | 1                      |                  | 1                     |                  |
| <b>No. of children</b>                        |                       |                  |                       |                  |                        |                  |                       |                  |
| No child                                      | 3.36<br>(2.36 - 4.79) | <b>&lt;0.001</b> | 3.46<br>(2.47 - 4.83) | <b>&lt;0.001</b> | 4.83<br>(1.96 - 11.92) | <b>0.005</b>     | 2.60<br>(1.17 - 5.76) | <b>0.026</b>     |
| 1 - 3 child                                   | 2.02<br>(1.26 - 3.22) | <b>0.011</b>     | 2.03<br>(1.32 - 3.11) | <b>0.007</b>     | 3.25<br>(0.75 - 14.15) | 0.098            | 2.16<br>(0.71 - 6.58) | 0.141            |
| > 3 child                                     | 1                     |                  | 1                     |                  | 1                      |                  | 1                     |                  |
| <b>Education level</b>                        |                       |                  |                       |                  |                        |                  |                       |                  |
| Degree and above                              | 3.02<br>(1.61 - 5.67) | <b>0.005</b>     | 3.12<br>(1.65 - 5.90) | <b>0.005</b>     | 2.57<br>(1.23 - 5.36)  | <b>0.020</b>     | 0.62<br>(0.29 - 1.28) | 0.154            |
| Diploma                                       | 1.89<br>(1.22 - 2.96) | <b>0.012</b>     | 1.91<br>(1.19 - 3.06) | <b>0.015</b>     | 2.55<br>(1.21 - 5.39)  | <b>0.022</b>     | 0.69<br>(0.28 - 1.76) | 0.376            |
| Certificate                                   | 1                     |                  | 1                     |                  | 1                      |                  | 1                     |                  |
| <b>Household Income</b>                       |                       |                  |                       |                  |                        |                  |                       |                  |
| B 40                                          | 1.05<br>(0.38 - 2.89) | 0.917            | 1.02<br>(0.37 - 2.81) | 0.962            | 3.68<br>(1.89 - 7.15)  | <b>0.003</b>     | 1.66<br>(0.90 - 3.05) | 0.089            |
| M 40                                          | 0.72<br>(0.30 - 1.70) | 0.383            | 0.69<br>(0.29 - 1.65) | 0.339            | 2.09<br>(1.17 - 3.71)  | <b>0.020</b>     | 1.14<br>(0.55 - 2.36) | 0.682            |
| T 20                                          | 1                     |                  | 1                     |                  | 1                      |                  | 1                     |                  |
| <b>Level of Healthcare</b>                    |                       |                  |                       |                  |                        |                  |                       |                  |
| Hospital                                      | 1.46<br>(0.63-3.38)   | 0.308            | 1.45<br>(0.62 - 3.37) | 0.324            | 1.86<br>(0.48 - 7.26)  | 0.307            | 2.14<br>(1.33 - 3.44) | <b>0.008</b>     |
| Primary Care                                  | 1                     |                  | 1                     |                  | 1                      |                  | 1                     |                  |
| <b>Year of Service (years)</b>                |                       |                  |                       |                  |                        |                  |                       |                  |
| 1 - 5                                         | 2.11<br>(1.49 - 2.99) | <b>0.002</b>     | 2.07<br>(1.51 - 2.84) | <b>0.001</b>     | 3.42<br>(2.09 - 5.57)  | <b>0.001</b>     | 1.28<br>(0.66 - 2.49) | 0.402            |
| 6 -10                                         | 1.69<br>(1.04 - 2.78) | <b>0.039</b>     | 1.67<br>(1.07 - 2.60) | <b>0.030</b>     | 2.16<br>(1.29 - 3.62)  | <b>0.011</b>     | 0.97<br>(0.56 - 1.67) | 0.885            |
| > 10                                          | 1                     |                  | 1                     |                  | 1                      |                  | 1                     |                  |
| <b>Time spend on clinical activities</b>      |                       |                  |                       |                  |                        |                  |                       |                  |
| > 50 %                                        | 0.74<br>(0.54 - 1.02) | 0.062            | 0.73<br>(0.53 - 1.01) | 0.053            | 0.97<br>(0.49 - 1.93)  | 0.908            | 0.98<br>(0.69 - 1.39) | 0.887            |
| < 50 %                                        | 1                     |                  | 1                     |                  | 1                      |                  | 1                     |                  |
| <b>Shift Work</b>                             |                       |                  |                       |                  |                        |                  |                       |                  |
| Yes                                           | 1.42<br>(0.95-2.13)   | 0.076            | 1.48<br>(0.99-2.24)   | 0.060            | 1.39<br>(0.83-2.34)    | 0.170            | 1.09<br>(0.33-3.54)   | 0.870            |
| No                                            | 1                     |                  | 1                     |                  | 1                      |                  | 1                     |                  |
| <b>Total number of shifts per month</b>       |                       |                  |                       |                  |                        |                  |                       |                  |
| > 24                                          | 1.11<br>(0.86-1.43)   | 0.417            | 0.98<br>(0.94-1.03)   | 0.394            | 0.43<br>(0.39-0.47)    | <b>&lt;0.001</b> | 0.50<br>(0.48-0.52)   | <b>&lt;0.001</b> |
| < 24                                          | 1                     |                  | 1                     |                  | 1                      |                  | 1                     |                  |
| <b>Total number of night shifts per month</b> |                       |                  |                       |                  |                        |                  |                       |                  |
| > 6                                           | 1.55<br>(1.18-2.02)   | <b>0.001</b>     | 1.76<br>(1.68-1.84)   | <b>&lt;0.001</b> | 2.99<br>(2.71-3.30)    | <b>&lt;0.001</b> | 1.19<br>(1.15-1.25)   | <b>&lt;0.001</b> |
| 1 - 6                                         | 1                     |                  | 1                     |                  | 1                      |                  | 1                     |                  |

|                                                                           | Burnout               |                  | High EE               |                  | High DP                |                  | Low PA                |                 |
|---------------------------------------------------------------------------|-----------------------|------------------|-----------------------|------------------|------------------------|------------------|-----------------------|-----------------|
|                                                                           | Crude OR<br>(95% CI)  | <i>p</i> -value  | Crude OR<br>(95% CI)  | <i>p</i> -value  | Crude OR<br>(95% CI)   | <i>p</i> -value  | Crude OR<br>(95% CI)  | <i>p</i> -value |
| <b>Total number of double shifts per month</b>                            |                       |                  |                       |                  |                        |                  |                       |                 |
| > 5                                                                       | 1.15<br>(1.07-1.25)   | <b>&lt;0.001</b> | 1.18<br>(1.09-1.28)   | <b>&lt;0.001</b> | 1.34<br>(1.17-1.53)    | <b>&lt;0.001</b> | 0.91<br>(0.85-0.99)   | <b>0.019</b>    |
| 1 - 5                                                                     | 1                     |                  | 1                     |                  | 1                      |                  | 1                     |                 |
| <b>Total number of on-call / extended hours per month</b>                 |                       |                  |                       |                  |                        |                  |                       |                 |
| > 6                                                                       | 1.48<br>(0.41 - 5.26) | 0.483            | 1.54<br>(0.35 - 6.73) | 0.498            | 1.17<br>(0.19 - 7.26)  | 0.839            | 0.46<br>(0.12 - 1.76) | 0.206           |
| 4 - 6                                                                     | 1.16<br>(0.36 - 3.74) | 0.760            | 1.28<br>(0.33 - 4.96) | 0.670            | 2.27<br>(0.49 - 10.46) | 0.236            | 0.39<br>(0.14 - 1.15) | 0.078           |
| 1 - 3                                                                     | 1                     |                  | 1                     |                  | 1                      |                  | 1                     |                 |
| <b>Sleeping Hours</b>                                                     |                       |                  |                       |                  |                        |                  |                       |                 |
| <6                                                                        | 2.72<br>(1.78 - 4.16) | <b>0.001</b>     | 2.78<br>(1.78-4.35)   | <b>0.001</b>     | 2.72<br>(1.06-7.00)    | 0.041            | 1.47<br>(0.77-2.81)   | 0.191           |
| 6-7                                                                       | 1.28<br>(0.78 - 2.09) | 0.270            | 1.27<br>(0.76-2.13)   | 0.307            | 1.23<br>(0.73-2.08)    | 0.367            | 1.32<br>(0.79-2.24)   | 0.245           |
| >7                                                                        | 1                     |                  | 1                     |                  | 1                      |                  | 1                     |                 |
| <b>Encountered traumatic event at work</b>                                |                       |                  |                       |                  |                        |                  |                       |                 |
| Yes                                                                       | 2.92<br>(2.24 - 3.81) | <b>&lt;0.001</b> | 2.85<br>(2.17-3.76)   | <b>&lt;0.001</b> | 4.11<br>(1.24-13.7)    | 0.028            | 1.14<br>(0.55-2.35)   | 0.685           |
| No                                                                        | 1                     |                  | 1                     |                  | 1                      |                  | 1                     |                 |
| <b>Received debriefing/psychological support for post-traumatic event</b> |                       |                  |                       |                  |                        |                  |                       |                 |
| Yes                                                                       | 0.42<br>(0.11 - 1.62) | 0.165            | 0.25<br>(0.06-1.05)   | 0.056            | 0.36<br>(0.08-1.58)    | 0.143            | 0.60<br>(0.15-2.41)   | 0.404           |
| No                                                                        | 1                     |                  | 1                     |                  | 1                      |                  | 1                     |                 |
| <b>Travelling Time to the Workplace</b>                                   |                       |                  |                       |                  |                        |                  |                       |                 |
| >30 minutes                                                               | 1.59<br>(0.89 - 2.86) | 0.100            | 1.59<br>(0.91-2.79)   | 0.091            | 1.61<br>(0.54-4.77)    | 0.329            | 2.86<br>(1.04-7.84)   | 0.044           |
| 16-30 minutes                                                             | 1.21<br>(0.79 - 1.85) | 0.326            | 1.22<br>(0.80-1.86)   | 0.292            | 1.56<br>(1.01-2.41)    | <b>0.047</b>     | 1.39<br>(0.85-2.30)   | 0.155           |
| <15 minutes                                                               | 1                     |                  | 1                     |                  | 1                      |                  | 1                     |                 |

All variables with  $p < 0.25$  at the univariate level were included in the multivariate logistic regression to determine the predictors for burnout among the nurses (Table 5). Based on the results, shift working nurses were 1.6 times more likely to develop burnout than their non-shift working counterparts. Those who performed more than six night shifts per month were more predisposed to experience overall burnout, high EE, and high DP at 1.54 (95% CI: 1.01, 2.36;  $p < 0.05$ ), 1.55 (95% CI: 1.44, 1.67;  $p < 0.001$ ), and 2.52 (95% CI: 2.18, 2.90;  $p < 0.001$ ) times, respectively. In addition, sleep deprivation led to significantly higher levels of overall burnout and EE. Having less than six hours of sleep per day increased the prevalence of burnout and EE by 2.89 (95% CI: 1.40, 5.97;  $p < 0.05$ ) and 2.94 times (95% CI: 1.36, 6.38;  $p < 0.05$ ). While encountering traumatic events at work led to 4.19 times (95% CI: 2.31, 7.63;  $p < 0.05$ ) higher risk of overall burnout and 4.42 times higher risk of EE (95% CI: 2.28, 8.57;  $p < 0.05$ ), those who received psychological support or debriefing post-traumatic events were protected against burnout.

1 Table 5: Association between sociodemographic and professional factors with burnout  
 2 among nurses using multivariate logistic regression  
 3

|                                                | Burnout               |              | High EE               |                  | High DP                   |                  | Low PA                |                  |
|------------------------------------------------|-----------------------|--------------|-----------------------|------------------|---------------------------|------------------|-----------------------|------------------|
|                                                | Adjusted OR (95% CI)  | p-value      | Adjusted OR (95% CI)  | p-value          | Adjusted OR (95% CI)      | p-value          | Adjusted OR (95% CI)  | p-value          |
| <b>Age Group (years)</b>                       |                       |              |                       |                  |                           |                  |                       |                  |
| 21- 30                                         | 0.94<br>(0.18 – 4.95) | 0.930        | 1.04<br>(0.26 – 4.22) | 0.942            | 0.07<br>(0.00 – 11.03)    | 0.240            | 2.10<br>(0.69 – 6.39) | 0.154            |
| 31- 40                                         | 0.78<br>(0.18 – 3.39) | 0.699        | 0.73<br>(0.21 – 2.59) | 0.570            | 4.13<br>(0.40 – 42.19)    | 0.178            | 2.23<br>(1.46 – 3.39) | <b>0.003</b>     |
| > 40                                           | 1                     |              | 1                     |                  | 1                         |                  | 1                     |                  |
| <b>Marital Status</b>                          |                       |              |                       |                  |                           |                  |                       |                  |
| Single                                         |                       |              |                       |                  |                           |                  | 0.56<br>(0.24 – 1.32) | 0.148            |
| Married                                        |                       |              |                       |                  |                           |                  | 1                     |                  |
| <b>No of Children</b>                          |                       |              |                       |                  |                           |                  |                       |                  |
| No child                                       | 2.13<br>(0.98 – 4.65) | 0.055        | 2.19<br>(0.88 – 5.45) | 0.081            | 0.45<br>(0.01 – 14.69)    | 0.585            | 1.55<br>(0.39 – 6.19) | 0.470            |
| 1 - 3 child                                    | 1.57<br>(0.56 – 4.42) | 0.328        | 1.42<br>(0.56 – 3.65) | 0.395            | 7.53<br>(0.55 – 104.08)   | 0.105            | 0.91<br>(0.58 – 1.44) | 0.645            |
| > 3 child                                      | 1                     |              | 1                     |                  | 1                         |                  | 1                     |                  |
| <b>Education level</b>                         |                       |              |                       |                  |                           |                  |                       |                  |
| Degree and above                               | 0.36<br>(0.04 – 2.97) | 0.281        | 0.37<br>(0.04 – 3.69) | 0.328            | 0.29<br>(0.05 – 1714.76)  | 0.727            | 0.35<br>(0.02 – 5.24) | 0.378            |
| Diploma                                        | 0.46<br>(0.09 – 2.54) | 0.311        | 0.43<br>(0.07 – 2.48) | 0.280            | 0.82<br>(0.00 – 280.84)   | 0.933            | 0.24<br>(0.03 – 2.02) | 0.152            |
| Certificate                                    | 1                     |              | 1                     |                  | 1                         |                  | 1                     |                  |
| <b>Household Income</b>                        |                       |              |                       |                  |                           |                  |                       |                  |
| B 40                                           |                       |              |                       |                  | 5.39<br>(0.04 – 840.39)   | 0.431            | 2.76<br>(0.87 – 8.76) | 0.075            |
| M 40                                           |                       |              |                       |                  | 3.22<br>(0.00 – 3041.25)  | 0.679            | 2.68<br>(1.19 – 6.08) | <b>0.025</b>     |
| T 20                                           |                       |              |                       |                  | 1                         |                  | 1                     |                  |
| <b>Level of Healthcare</b>                     |                       |              |                       |                  |                           |                  |                       |                  |
| Hospital                                       |                       |              |                       |                  |                           |                  |                       |                  |
| Primary Care                                   |                       |              |                       |                  |                           |                  |                       |                  |
| <b>Year of Service (years)</b>                 |                       |              |                       |                  |                           |                  |                       |                  |
| 1 - 5                                          | 0.69<br>(0.18 – 2.61) | 0.514        | 0.49<br>(0.10 – 2.45) | 0.324            | 80.67<br>(0.70 – 9256.64) | 0.063            |                       |                  |
| 6 -10                                          | 0.92<br>(0.26 – 3.22) | 0.881        | 0.76<br>(0.21 – 2.76) | 0.617            | 4.52<br>(0.491 – 41.68)   | 0.141            |                       |                  |
| > 10                                           | 1                     |              | 1                     |                  | 1                         |                  |                       |                  |
| <b>Time spent on clinical activities</b>       |                       |              |                       |                  |                           |                  |                       |                  |
| > 50 %                                         | 0.91<br>(0.63 – 1.32) | 0.568        | 0.85<br>(0.62 – 1.17) | 0.265            |                           |                  |                       |                  |
| < 50 %                                         | 1                     |              | 1                     |                  |                           |                  |                       |                  |
| <b>Shift Work</b>                              |                       |              |                       |                  |                           |                  |                       |                  |
| Yes                                            | 1.56<br>(0.45 – 1.92) | <b>0.023</b> | 1.16<br>(0.59 – 1.25) | 0.360            | 1.85<br>(0.00 – 3817.23)  | 0.843            |                       |                  |
| No                                             | 1                     |              | 1                     |                  | 1                         |                  |                       |                  |
| <b>Total number of shifts per month</b>        |                       |              |                       |                  |                           |                  |                       |                  |
| > 24                                           |                       |              |                       |                  | 2.61<br>(2.27 – 3.01)     | <b>&lt;0.001</b> | 2.28<br>(2.12 – 2.45) | <b>&lt;0.001</b> |
| < 24                                           |                       |              |                       |                  | 1                         |                  | 1                     |                  |
| <b>Total number of night shifts per month</b>  |                       |              |                       |                  |                           |                  |                       |                  |
| > 6                                            | 1.54<br>(1.01 - 2.36) | <b>0.045</b> | 1.55<br>(1.44 – 1.67) | <b>&lt;0.001</b> | 2.52<br>(2.18 – 2.90)     | <b>&lt;0.001</b> | 1.04<br>(0.97 – 1.12) | 0.240            |
| 1 - 6                                          | 1                     |              | 1                     |                  | 1                         |                  | 1                     |                  |
| <b>Total number of double shifts per month</b> |                       |              |                       |                  |                           |                  |                       |                  |

|                                                                           | Burnout                 |              | High EE                 |              | High DP                  |         | Low PA                  |              |
|---------------------------------------------------------------------------|-------------------------|--------------|-------------------------|--------------|--------------------------|---------|-------------------------|--------------|
|                                                                           | Adjusted OR<br>(95% CI) | p-value      | Adjusted OR<br>(95% CI) | p-value      | Adjusted OR<br>(95% CI)  | p-value | Adjusted<br>OR (95% CI) | p-value      |
| > 5                                                                       | 0.86<br>(0.54 – 1.37)   | 0.522        | 0.94<br>(0.87 – 1.02)   | 0.154        | 1.04<br>(0.89 – 1.21)    | 0.660   | 1.86<br>(0.79 – 1.93)   | <0.001       |
| 1 – 5                                                                     | 1                       |              | 1                       |              | 1                        |         | 1                       |              |
| <b>Total number of on-call / extended hours per month</b>                 |                         |              |                         |              |                          |         |                         |              |
| > 7                                                                       |                         |              |                         |              | 2.47<br>(0.08 – 73.03)   | 0.522   | 0.65<br>(0.41 – 1.03)   | 0.062        |
| 4 – 6                                                                     |                         |              |                         |              | 4.69<br>(0.14 – 163.22)  | 0.314   | 0.64<br>(0.23 – 1.81)   | 0.334        |
| 1 – 3                                                                     |                         |              |                         |              | 1                        |         | 1                       |              |
| <b>Sleeping Hours</b>                                                     |                         |              |                         |              |                          |         |                         |              |
| <6                                                                        | 2.89<br>(1.40 – 5.97)   | <b>0.011</b> | 2.94<br>(1.36 – 6.38)   | <b>0.014</b> | 1.81<br>(0.77 – 4.24)    | 0.140   | 1.59<br>(0.69 – 2.62)   | 0.064        |
| 6-7                                                                       | 1.62<br>(0.75 – 3.48)   | 0.176        | 1.43<br>(0.72 – 2.87)   | 0.252        | 1.24<br>(0.55 – 2.75)    | 0.543   | 1.28<br>(0.93 – 1.76)   | 0.110        |
| >7                                                                        | 1                       |              | 1                       |              | 1                        |         | 1                       |              |
| <b>Encountered traumatic event at work</b>                                |                         |              |                         |              |                          |         |                         |              |
| Yes                                                                       | 4.19<br>(2.31 – 7.63)   | <b>0.001</b> | 4.42<br>(2.28 – 8.57)   | <b>0.002</b> | 2.99<br>(0.98 – 9.07)    | 0.053   |                         |              |
| No                                                                        | 1                       |              | 1                       |              | 1                        |         |                         |              |
| <b>Received debriefing/psychological support for post-traumatic event</b> |                         |              |                         |              |                          |         |                         |              |
| Yes                                                                       | 0.47<br>(0.28 – 0.79)   | <b>0.013</b> | 0.49<br>(0.28 – 0.88)   | <b>0.025</b> | 0.21<br>(0.01 – 3817.23) | 0.201   |                         |              |
| No                                                                        | 1                       |              | 1                       |              | 1                        |         |                         |              |
| <b>Travelling Time to the Workplace</b>                                   |                         |              |                         |              |                          |         |                         |              |
| >30 minutes                                                               | 3.55<br>(0.69 – 18.09)  | 0.106        | 3.95<br>(0.88 – 17.78)  | 0.067        | 0.13<br>(0.01 – 2.06)    | 0.115   | 2.24<br>(1.18 – 4.23)   | <b>0.021</b> |
| 16-30 minutes                                                             | 1.38<br>(0.45 – 4.23)   | 0.509        | 1.44<br>(0.58 – 3.62)   | 0.368        | 0.94<br>(0.14 – 6.24)    | 0.938   | 1.05<br>(0.29 – 3.76)   | 0.928        |
| <15 minutes                                                               | 1                       |              | 1                       |              | 1                        |         |                         |              |

## Discussion

Burnout among HCW is a global phenomenon that can cast a profound negative impact on the personal wellbeing and organisational performance. This study was planned and executed back in 2019 in view of the lack of national-level data on the prevalence and common predictors of burnout among nurses in Malaysia. The results have now become important baseline data to compare the pre- and post-pandemic levels of burnout among the nurses in Malaysia.

In this study, one in every four nurses experienced burnout. The prevalence of burnout (24.4%) was comparable to single-centred studies among nurses from teaching hospitals in Malaysia (27.3%) [13] and Thailand (22.0%) [19]. However, it was half of the prevalence among nurses in Indonesia (48.8%) [20]. In contrast, the pool prevalence of burnout globally was lower at 11.2% according to a systematic review [21] and in Brazil (18.3%) [22]. While the actual prevalence of burnout is likely to be different across countries and settings, the differences can also be attributed to the tools and classifications of burnout used in each published study.

1  
2  
3 1  
4  
5 2 With regard to the three domains of burnout, a high proportion of nurses in this study  
6 3 experienced low PA (41.6%) and high EE (23.9%), with a smaller percentage of them having  
7 4 high DP (4.5%). Similar results were reported among primary care providers in China, except  
8 5 for higher prevalence rates for each domain (low PA: 41.4%, high EE: 33.1%, high DP: 8.8%)  
9 6 [23]. Malaysia recorded a slightly higher nurse-to-population ratio at 1:297 [24] compared to  
10 7 the ratio of 1:250 recommended by the World Health Organisation (WHO) [25]. A high nurse-  
11 8 to- patient ratio that indicated poor staffing and shortages of basic medical equipment at work  
12 9 were significantly associated with the risk of developing EE [26-27]. In addition, Yeun and Kim  
13 10 described that supervisory support is vital in minimising EE by nurturing a sense of PA among  
14 11 the staff. In fact, this support is so essential that it has been linked with the retention of nurses  
15 12 [28]. Apart from that, the sense of PA often heightens with higher levels of education. Studies  
16 13 from other countries that reported a lower prevalence of low PA consisted mostly of nurses  
17 14 who were degree or master holders [29]. In comparison, only 5.2% of our nurses were degree  
18 15 holders, thus likely attributed to the higher prevalence of low PA. Hence, one of the long-term  
19 16 strategies to enhance nurses' PA and reduce their burnout is by improving their access to  
20 17 further education to elevate their professional status [30].  
21 18  
22 19

23 19 In terms of age group, younger nurses reported a higher prevalence of burnout in this  
24 20 study. This is in line with previous studies from various countries [31–37]. In addition, similar  
25 21 to other studies [13, 32, 38], years of working experience were also associated with burnout  
26 22 whereby junior nurses were more susceptible to burnout than their senior counterparts. This  
27 23 could be attributed to the fact that junior nurses have yet to master the nursing skills, thus  
28 24 requiring a longer period to complete their tasks. They might also lack resilience in managing  
29 25 occupational stress, a skill that is often acquired with longer years of work experience [33, 38–  
30 26 40]. With regard to the association between burnout with marital status and the number of  
31 27 children, there have been contradictory findings in the research. In this study, burnout was  
32 28 higher among nurses who were single. Some studies reported that single nurses tend to have  
33 29 less social and family support, thus predisposing them to burnout [39, 41–43]. Furthermore,  
34 30 in this study, a lower number of children was also a significant predictor of burnout. However,  
35 31 most of the published studies reported the opposite whereby nurses with children were  
36 32 associated with higher EE and decreased PA, likely due to the additional obligations and  
37 33 potential family-work conflicts [33, 44, 45]. Recent studies have reported an association  
38 34 between smoking and alcohol use with burnout among healthcare professionals in other  
39 35 countries. However, disparities in the sociocultural norms, as well as tobacco and alcohol  
40 36 legislation, could explain the prevalence dissimilarity across countries. In this study, the  
41 37 prevalence of smoking and alcohol use was very low (<0.1%). According to the Malaysian



1  
2  
3 1 National Health Morbidity Survey (NHMS), the ratio of Malaysian male to female smokers was  
4 2 31:1. Furthermore, other ethnicities apart from Malays were more likely to be associated with  
5 3 alcohol consumption [46]. Given that nurses in Malaysia are predominantly female Malay  
6 4 Muslims, it is unsurprising to find a low prevalence of smokers and alcohol drinkers among  
7 5 our study population. Thus, both of these variables were excluded from further analysis.  
8  
9  
10  
11  
12

13 7 Working schedule also plays a vital role in the development of burnout, especially  
14 8 among hospital nurses who need to perform shift duties. In this study, while the total number  
15 9 of shifts per month was not significantly linked to the development of burnout, the number of  
16 10 night shifts was a significant predictor of overall burnout, high EE, and high DP. Similarly, a  
17 11 higher number of double shifts led to low PA. Similar findings were noted among nurses in  
18 12 China and Thailand [19, 37, 47-48]. Shift work rotation may disrupt the circadian rhythm and  
19 13 sleeping patterns of the involved staff. Previous research found that nurses on more rotational  
20 14 shifts or night shifts were more likely to suffer from negative physical and psychological health  
21 15 impacts [49]. Additionally, night shift workers commonly experience excessive daytime fatigue  
22 16 and somnolence that predispose them to higher risks EE and DP [50]. Despite these health  
23 17 hazards, the nature of shift work will be hard to modify as it is an integral part of the nursing  
24 18 profession to provide round-the-clock patient care. Therefore, it is vital to integrate important  
25 19 components such as sleep hygiene and psychosocial support into the nursing education  
26 20 curriculum to better equip young nurses in facing the impending challenges in their future  
27 21 careers.  
28  
29  
30  
31  
32  
33  
34  
35  
36  
37

38 23 Healthcare workers, especially doctors and nurses, are often exposed to highly  
39 24 stressful traumatic events such as witnessing deaths or injuries, dealing with patients with  
40 25 critical illnesses, and managing the demands of patients' relatives. Often, nurses are expected  
41 26 to remain stoic and continue caring for the patients after these stressful situations,  
42 27 subsequently leading to the development of burnout. Debriefing or psychological support was  
43 28 proposed as one of the ways to reduce the incidence of burnout from post-traumatic events  
44 29 [51]. This is evidenced by our study findings in which nurses who experienced traumatic  
45 30 events were less likely to develop burnout following debriefing or psychological support  
46 31 sessions. Debriefing, taking regular breaks, and utilising stress reduction measures  
47 32 throughout shifts have been demonstrated to reduce the risk of burnout among nurses [52].  
48 33 However, only one-quarter of nurses who encountered traumatic events at work received  
49 34 debriefing in this study. In view of this, a structured debriefing system should be put in place  
50 35 in various health facilities to provide the necessary psychological support services to ensure  
51 36 the mental wellbeing of nurses and other HCWs alike.  
52  
53  
54  
55  
56  
57  
58  
59  
60

1  
2  
3 1 In this study, we also evaluated the coping mechanisms applied by the nurses.  
4 2 Different coping strategies, be it problem-focused, emotion-focused, or dysfunctional  
5 3 mechanisms can have varying effects on personal emotions and work approaches. Problem-  
6 4 focused coping responses to distress reflect positive cognitive and behavioural efforts in  
7 5 resolving life stressors. Thus, it can be beneficial in dealing with stressors [53]. In a recent  
8 6 study, the use of emotion-focused and dysfunctional coping styles was linked to higher levels  
9 7 of EE, whereas problem-focused coping styles were linked to lower scores of DP and higher  
10 8 scores of PA [54]. In this study, the use of religion as an emotion-focused coping strategy  
11 9 showed a positive correlation with high PA and low DP. Similarly, in Pakistan [55] and  
12 10 Palestine [56], praying and other religious activities were the highest-ranked coping  
13 11 techniques practised by the HCW. Religious belief was shown to be helpful for nurses to deal  
14 12 with challenges at work and maintaining the quality of healthcare [57-58]. In contrast, the use  
15 13 of dysfunctional coping mechanism has been linked with mood disturbances and poor mental  
16 14 health [42, 48]. A high number of nurses relied on dysfunctional coping strategies such as  
17 15 behavioural disengagement and venting that led to a significant increase in the three domains  
18 16 of burnout. This echoed the findings of two other studies whereby dysfunctional coping was  
19 17 strongly linked to EE and DP [59-60].  
20 18

21 19 Accordingly, one of the major practical implications of our research findings is that it  
22 20 provides much-needed empirical data on the actual prevalence of burnout on a national-level.  
23 21 With one in four nurses experiencing burnout, more attention and resources are warranted to  
24 22 prevent a worsening of the problem. A second important contribution of our study revolves  
25 23 around the need to instil positive coping strategies, especially among at-risk nurses. An  
26 24 effective coping mechanism may reduce burnout among nurses as well as boost their  
27 25 productivity and quality of life [61]. Therefore, organisation-driven interventions such as  
28 26 educational and training programmes aimed at improving nurses' coping skills should be  
29 27 implemented from an early stage to better prepare them in managing psychosocial stressors  
30 28 at work. Other organisational measures including multidisciplinary psychosocial support such  
31 29 as debriefing post-traumatic events and involvement of healthcare professionals in the  
32 30 creation, testing, and assessment of prevention measures against burnout can also be  
33 31 considered to reduce burnout [51, 62-63].  
34 32

35 33 This was the first nationwide study in Malaysia to determine the prevalence of burnout  
36 34 using a complex sampling analysis with a large sample size representative of the nursing  
37 35 population in the public healthcare sector. The identified risk factors for burnout enable the  
38 36 policymakers and hospital managers to implement effective preventive initiatives that target  
39 37 the susceptible population. However, there are some limitations to this study. As this was a

1  
2  
3 1 cross-sectional study, it was difficult to establish the link between the exposure and outcome  
4 2 as both are assessed at the same time. In addition, self-administered questionnaire was  
5 3 susceptible to recall bias and social desirability bias. In this study, we only focused on  
6 4 predictors of burnout from the individual perspective of nurses. With increasing evidence  
7 5 showing the roles of interpersonal and organisational stressors in the development of burnout,  
8 6 future research should consider longitudinal studies that encompass a wider range of  
9 7 variables to establish the predisposing factors of burnout at various levels.  
10 8

## 9 **Conclusion**

10  
11 11 In this study, one in four public nurses suffered from burnout in Malaysia. Younger, single, and  
12 12 childless nurses recorded a higher level of burnout. Shift works, especially night shifts  
13 13 significantly predisposed to burnout. As compared to problem-focused coping strategies that  
14 14 reduced burnout, dysfunctional coping strategies should be discouraged as they led to higher  
15 15 levels of EE, DP, and low PA. Following the two years battle with the COVID-19 pandemic,  
16 16 known and new stressors are likely intensified, predisposing nurses who are the main  
17 17 workforce of front liners in the Malaysian health workforce to even higher levels of strain and  
18 18 burnout. Therefore, it is essential to implement the necessary preventive and promotive efforts  
19 19 among the high-risk vulnerable nurses identified in this study. Modifiable stressors must be  
20 20 addressed via inculcation of positive coping strategies to mitigate potential mental health  
21 21 impacts. Organisational reform in the form of system-level efforts to reinvent and innovate  
22 22 workflow, human resources, and workplace wellness is critical to decreasing burnout among  
23 23 nurses.  
24

## 1 **Author contributions**

2 All authors designed the project and data collection tools. All authors collected the data. NZ,  
3 NHZ, and LKY cleaned, analysed, and interpreted the data. NZ, NHZ, and AR drafted the  
4 paper. LKY reviewed and gave technical advisory towards the manuscript as well as  
5 contributed important revisions. All authors read and approved the manuscript. The  
6 corresponding author attests that all listed authors meet authorship criteria and that no others  
7 meeting the criteria have been omitted.

## 9 **Funding**

10 This study was supported by the National Institutes of Health grant [NMRR-18-3590 45274].

## 12 **Competing interest**

13 None declared.

## 15 **Ethics approval**

16 Ethics approval was obtained from the Medical Research and Ethics Committee (MREC) of  
17 the Ministry of Health Malaysia prior to the conduct of this study, Ref: KKM/NIHSEC/P19-683  
18 (13). Participants gave informed consent to participate in this research prior to taking part. All  
19 names were kept on a password-protected database and were linked only with a study  
20 identification number. All the data involved in this study is only restricted to the use by the  
21 investigator.

## 23 **Data availability statement**

24 The data that support the study findings are available from the Ministry of Health Malaysia.  
25 Restrictions apply to the data availability, which was used under license for the current article,  
26 so it is not publicly available. Nevertheless, data are available from the authors upon  
27 reasonable request together with the permission of the Ministry of Health Malaysia.

## 29 **Acknowledgement**

30 We wish to thank the Director General of Health, Malaysia for his permission to publish this  
31 article. Our deepest gratitude to all the nurses who were involved in the study.



- 1  
2  
3 1 *Malaysian J. Public Heal. Med.*, vol. 11, no. 1, pp. 78–85, 2011.
- 4  
5  
6 2 [12] A. S. Zuraida and N. Z. Zainal, “Exploring burnout among Malaysian junior doctors  
7 3 using the abbreviated Maslach Burnout Inventory,” *Malaysian J. Psychiatry*, vol. 24,  
8 4 no. 1, pp. 32–41, 2015.
- 9  
10  
11 5 [13] C. S. Siau *et al.*, “Predicting burnout and psychological distress risks of hospital  
12 6 healthcare workers,” *Malaysian J. Public Heal. Med.*, vol. 2018, no. Specialissue1, pp.  
13 7 125–136, 2018.
- 14  
15  
16  
17 8 [14] Department of Statistics, Malaysia. HOUSEHOLD INCOME AND BASIC  
18 9 AMENITIES SURVEY 2019. Putrajaya: Department of Statistics, Malaysia.  
19 10 2020
- 20  
21  
22  
23 11 [15] M. P. Christina Maslach, Susan E Jackson, *Maslach burnout inventory*, Third. Palo  
24 12 Alto, California Consulting Psychologist Press, 1996.
- 25  
26  
27 13 [16] W. S. Chen *et al.*, “Translation, Cross-cultural Adaptation and Validation of the Malay  
28 14 Version of the Maslach Burnout Inventory (MBI) in Malaysia,” *Int. J. Soc. Sci. Stud.*,  
29 15 vol. 2, no. 2, pp. 66–74, 2014.
- 30  
31  
32  
33 16 [17] B. Y. Muhamad Saiful, “The Validity of the Malay Brief Cope in Identifying,” *Int. Med.*  
34 17 *J.*, vol. 18, no. March 2011, pp. 29–33, 2011.
- 35  
36  
37 18 [18] Charles S. Carver, “You want to measure coping but your protocol’s too long:  
38 19 Consider the brief COPE,” *Int. J. Behav. Med.*, vol. 4, no. 1, pp. 92–100, 1997.
- 39  
40  
41 20 [19] A. Wisetborisut, C. Angkurawaranon, W. Jiraporncharoen, R. Uaphanthasath, and P.  
42 21 Wiwatanadate, “Shift work and burnout among health care workers,” *Occup. Med.*  
43 22 (*Chic. Ill.*), vol. 64, no. 4, pp. 279–286, 2014.
- 44  
45  
46  
47 23 [20] K. Rusca Putra and Setyowati, “Prevalence of burnout syndrome among nurses in  
48 24 general hospitals in provincial East Java: Cross-sectional study,” *Enferm. Clin.*, vol.  
49 25 29, no. Insc 2018, pp. 362–366, 2019.
- 50  
51  
52  
53 26 [21] T. Woo, R. Ho, A. Tang, and W. Tam, “Global prevalence of burnout symptoms  
54 27 among nurses: A systematic review and meta-analysis,” *J. Psychiatr. Res.*, vol. 123,  
55 28 pp. 9–20, Apr. 2020.
- 56  
57  
58  
59 29 [22] M. C. Das Mercedes *et al.*, “Prevalence and factors associated with burnout syndrome  
60

- 1  
2  
3 1 among primary health care nursing professionals: A cross-sectional study," *Int. J.*  
4 *Environ. Res. Public Health*, vol. 17, no. 2, 2020.  
5 2  
6  
7 3 [23] H. Li, B. Yuan, Q. Meng, and I. Kawachi, "Contextual factors associated with burnout  
8 among Chinese primary care providers: A multilevel analysis," *Int. J. Environ. Res.*  
9 *Public Health*, vol. 16, no. 19, 2019.  
10 4  
11 5  
12  
13 6 [24] Ministry Of Health Malaysia, "Health Facts 2021," vol. 21, no. November, 2021.  
14  
15 7 [25] "Indicators index." [Online]. Available:  
16 8 <https://www.who.int/data/gho/data/indicators/indicators-index>. [Accessed: 15-Aug-  
17 9 2022].  
18  
19  
20  
21 10 [26] A. Bruyneel, P. Smith, J. Tack, and M. Pirson, "Prevalence of burnout risk and factors  
22 associated with burnout risk among ICU nurses during the COVID-19 outbreak in  
23 French speaking Belgium," *Intensive Crit. Care Nurs.*, vol. 65, no. xxxx, p. 103059,  
24 12 2021.  
25  
26 13  
27  
28 14 [27] L. H. Aiken *et al.*, "Patient safety, satisfaction, and quality of hospital care: Cross  
29 15 sectional surveys of nurses and patients in 12 countries in Europe and the United  
30 16 States," *BMJ*, vol. 344, no. 7851, pp. 1–14, 2012.  
31  
32  
33 17 [28] E. Yeun and H. Kim, "The Effects of Supervisor Support, Emotional Exhaustion, and  
34 18 Sense of Personal Accomplishment on Hospital Nurse Turnover Intentions," *Indian J.*  
35 19 *Sci. Technol.*, vol. 8, no. S5, pp. 63–68, Mar. 2015.  
36  
37  
38 20 [29] L. H. Aiken *et al.*, "Importance of work environments on hospital outcomes in nine  
39 21 countries," *Int. J. Qual. Heal. Care*, vol. 23, no. 4, pp. 357–364, 2011.  
40  
41  
42 22 [30] L. feng Zhang *et al.*, "The association of Chinese hospital work environment with  
43 23 nurse burnout, job satisfaction, and intention to leave," *Nurs. Outlook*, vol. 62, no. 2,  
44 24 pp. 128–137, 2014.  
45  
46  
47 25 [31] T. Ahmed, H. Shah, A. Rasheed, and A. Ali, "Burnout among nurses working at Dow  
48 26 and Civil Hospitals in Karachi: A cross-sectional study," *J. Pak. Med. Assoc.*, vol. 70,  
49 27 no. 6, pp. 1018–1022, 2020.  
50  
51  
52 28 [32] A. Khodadadzadeh, A. Ravari, A. Sayadi, H. Khodadadi, and H. Jafarinaveh,  
53 29 "Occupational burnout assessment among nurses working in Iranian hospital of Ali-  
54 30 ebn Abitaleb, Rafsanjan- Iran," *J. Occup. Heal. Epidemiol.*, vol. 1, no. 2, pp. 103–110,  
55  
56  
57  
58  
59  
60

- 1  
2  
3 1 2012.  
4  
5  
6 2 [33] E. Ayala and A. M. Carnero, "Determinants of Burnout in Acute and Critical Care  
7 3 Military Nursing Personnel: A Cross-Sectional Study from Peru," *PLoS One*, vol. 8,  
8 4 no. 1, 2013.  
9  
10  
11 5 [34] A. Bartosiewicz and P. Januszewicz, "Readiness of Polish nurses for prescribing and  
12 6 the level of professional burnout," *Int. J. Environ. Res. Public Health*, vol. 16, no. 1,  
13 7 2019.  
14  
15  
16  
17 8 [35] S. C. P. S. Silva, M. A. P. Nunes, V. R. Santana, F. P. Reis, J. Machado Neto, and S.  
18 9 O. Lima, "A síndrome de burnout em profissionais da rede de atenção primária à  
19 10 Saúde de Aracaju, Brasil," *Cienc. e Saude Coletiva*, vol. 20, no. 10, pp. 3011–3020,  
20 11 2015.  
21  
22  
23  
24 12 [36] E. Amofo, N. Hanbali, A. Patel, and P. Singh, "What are the significant factors  
25 13 associated with burnout in doctors?," *Occup. Med. (Lond)*, vol. 65, no. 2, pp. 117–  
26 14 121, 2015.  
27  
28  
29  
30 15 [37] L. P. Chou, C. Y. Li, and S. C. Hu, "Job stress and burnout in hospital employees:  
31 16 Comparisons of different medical professions in a regional hospital in Taiwan," *BMJ*  
32 17 *Open*, vol. 4, no. 2, pp. 1–7, 2014.  
33  
34  
35  
36 18 [38] E. Zarei, F. Ahmadi, M. S. Sial, J. Hwang, and P. A. Thu, "Prevalence of Burnout  
37 19 among Primary Health Care Staff and Its Predictors: A Study in Iran," *Int. J. Environ.*  
38 20 *Res. Public Health*, 2019.  
39  
40  
41  
42 21 [39] Y.-H. Lee and M.-H. Lin, "Exploring the Relationship Between Burnout and Job  
43 22 Satisfaction Among Clinical Nurses," *Eur. Sci. J. ESJ*, vol. 15, no. 3, pp. 449–460,  
44 23 2019.  
45  
46  
47  
48 24 [40] F. E. Okwaraji and E. N. Aguwa, "Burnout and psychological distress among nurses in  
49 25 a Nigerian tertiary health institution," *Afr. Health Sci.*, vol. 14, no. 1, pp. 237–245,  
50 26 2014.  
51  
52  
53  
54 27 [41] J. Wang *et al.*, "Prevalence of burnout among intensivists in mainland China: a  
55 28 nationwide cross-sectional survey," *Crit. Care*, vol. 25, no. 1, pp. 1–10, 2021.  
56  
57  
58 29 [42] M. Sofology, M. Efstratopoulou, and T. Dunn, "Predicting Burnout Syndrome in Greek  
59 30 Mental Health Professionals," *J. Soc. Serv. Res.*, vol. 45, no. 1, pp. 142–149, 2019.  
60



- 1  
2  
3 1 [43] E. M. de Vasconcelos and M. M. F. De Martino, "Predictors of burnout syndrome in  
4 intensive care nurses," *Rev. Gauch. Enferm.*, vol. 38, no. 4, p. e65354, 2018.  
5 2  
6  
7 3 [44] Z. Ashrafi, H. Ebrahimi, A. Khosravi, A. Navidian, and A. Ghajar, "The Relationship  
8 Between Quality of Work Life and Burnout: A Linear Regression Structural-Equation  
9 Modeling," *Heal. Scope*, vol. 7, no. 1, pp. 1–7, 2018.  
10 4  
11 5  
12  
13 6 [45] G. A. Cañadas-De La Fuente, E. Ortega, L. Ramirez-Baena, E. I. De La Fuente-  
14 Solana, C. Vargas, and J. Luis Gómez-Urquiza, "Gender, marital status, and children  
15 as risk factors for burnout in nurses: A meta-analytic study," *mdpi.com*.  
16 7  
17 8  
18  
19 9 [46] Institute for Public Health (IPH) 2015. National Health and Morbidity Survey 2015  
20 (NHMS 2015). Vol. II: Non-Communicable Diseases, Risk Factors & Other Health  
21 Problems; 2015.  
22 10  
23 11  
24  
25 12 [47] Z. Xie, A. Wang, and B. Chen, "Nurse burnout and its association with occupational  
26 stress in a cross-sectional study in Shanghai," *J. Adv. Nurs.*, vol. 67, no. 7, pp. 1537–  
27 1546, 2011.  
28 13  
29 14  
30  
31 15 [48] Y. Yestiana, T. Kurniati, and A. A. A. Hidayat, "Predictors of burnout in nurses working  
32 in inpatient rooms at a public hospital in Indonesia," *Pan Afr. Med. J.*, vol. 33, pp. 1–8,  
33 2019.  
34 16  
35 17  
36  
37 18 [49] P. C. Lin *et al.*, "The association between rotating shift work and increased  
38 occupational stress in nurses," *J. Occup. Health*, vol. 57, no. 4, pp. 307–315, 2015.  
39 19  
40  
41 20 [50] K. V. Amaral, M. J. Q. Galdino, and J. T. Martins, "Burnout, daytime sleepiness and  
42 sleep quality among technical-level Nursing students," *Rev. Lat. Am. Enfermagem*,  
43 vol. 29, 2021.  
44 21  
45 22  
46  
47 23 [51] M. Govindan, P. Keefer, J. Sturza, M. R. Stephens, and N. Malas, "Empowering  
48 Residents to Process Distressing Events: A Debriefing Workshop," *MedEdPORTAL*  
49 *J. Teach. Learn. Resour.*, vol. 15, p. 10809, 2019.  
50 24  
51  
52 26 [52] J. Maben and J. Bridges, "Covid-19: Supporting nurses' psychological and mental  
53 health," *J. Clin. Nurs.*, vol. 29, no. 15–16, pp. 2742–2750, 2020.  
54 27  
55  
56 28 [53] A. Fathi and R. H. Simamora, "Investigating nurses' coping strategies in their  
57 workplace as an indicator of quality of nurses' life in Indonesia: A preliminary study,"  
58 *IOP Conf. Ser. Earth Environ. Sci.*, vol. 248, no. 1, 2019.  
59 29  
60 30

- 1  
2  
3 1 [54] C. Di Monte, S. Monaco, R. Mariani, and M. Di Trani, "From Resilience to Burnout:  
4 Psychological Features of Italian General Practitioners During COVID-19  
5 Emergency," *Front. Psychol.*, vol. 11, no. October, 2020.  
6  
7  
8  
9 4 [55] M. Salman *et al.*, "The psychological effects of COVID-19 on frontline healthcare  
10 workers and how they are coping: a web-based, cross-sectional study from Pakistan,"  
11 *medRxiv*, p. 2020.06.03.20119867, 2020.  
12  
13  
14 7 [56] B. Maraqa, Z. Nazzal, and T. Zink, "Palestinian Health Care Workers' Stress and  
15 Stressors During COVID-19 Pandemic: A Cross-Sectional Study," *J. Prim. Care  
16 Community Heal.*, vol. 11, 2020.  
17  
18  
19 10 [57] A. Mattei, F. Fiasca, M. Mazzei, V. Abbossida, and V. Bianchini, "Burnout among  
20 healthcare workers at L'Aquila: its prevalence and associated factors," *Psychol. Heal.  
21 Med.*, vol. 22, no. 10, pp. 1262–1270, 2017.  
22  
23  
24 13 [58] A. Shechter *et al.*, "Psychological distress, coping behaviors, and preferences for  
25 support among New York healthcare workers during the COVID-19 pandemic," *Gen.  
26 Hosp. Psychiatry*, vol. 66, no. May, pp. 1–8, 2020.  
27  
28  
29 16 [59] K. Mctiernan and N. McDonald, "Occupational stressors, burnout and coping  
30 strategies between hospital and community psychiatric nurses in a Dublin region," *J.  
31 Psychiatr. Ment. Health Nurs.*, vol. 22, no. 3, pp. 208–218, Apr. 2015.  
32  
33  
34 19 [60] H. Zhou *et al.*, "Mediating effect of coping styles on the association between  
35 psychological capital and psychological distress among Chinese nurses: a cross-  
36 sectional study," *J. Psychiatr. Ment. Health Nurs.*, vol. 24, no. 2–3, pp. 114–122, Mar.  
37 2017.  
38  
39  
40 23 [61] H. F. Lee, C. C. Kuo, T. W. Chien, and Y. R. Wang, "A Meta-Analysis of the Effects of  
41 Coping Strategies on Reducing Nurse Burnout," *Appl. Nurs. Res.*, 2016.  
42  
43  
44 25 [62] C. G. Leo *et al.*, "Burnout Among Healthcare Workers in the COVID 19 Era: A Review  
45 of the Existing Literature," *Front. Public Heal.*, vol. 9, no. October, pp. 1–6, 2021.  
46  
47  
48 27 [63] E. D. Browning and J. S. Cruz, "Reflective Debriefing: A Social Work Intervention  
49 Addressing Moral Distress among ICU Nurses," *J. Soc. Work End-of-Life Palliat.  
50 Care*, vol. 14, no. 1, pp. 44–72, 2018.  
51  
52  
53  
54  
55  
56  
57  
58  
59  
60

# Reporting checklist for cross sectional study.

Based on the STROBE cross sectional guidelines.

## Instructions to authors

Complete this checklist by entering the page numbers from your manuscript where readers will find each of the items listed below.

Your article may not currently address all the items on the checklist. Please modify your text to include the missing information. If you are certain that an item does not apply, please write "n/a" and provide a short explanation.

Upload your completed checklist as an extra file when you submit to a journal.

In your methods section, say that you used the STROBE cross sectional reporting guidelines, and cite them as:

von Elm E, Altman DG, Egger M, Pocock SJ, Gotsche PC, Vandenbroucke JP. The Strengthening the Reporting of Observational Studies in Epidemiology (STROBE) Statement: guidelines for reporting observational studies.

|                           |                     |                                                                                    | Page   |
|---------------------------|---------------------|------------------------------------------------------------------------------------|--------|
|                           |                     | Reporting Item                                                                     | Number |
| <b>Title and abstract</b> |                     |                                                                                    |        |
| Title                     | <a href="#">#1a</a> | Indicate the study's design with a commonly used term in the title or the abstract | 2      |
| Abstract                  | <a href="#">#1b</a> | Provide in the abstract an informative and balanced summary                        | 2      |

of what was done and what was found

## Introduction

|                           |                    |                                                                                      |   |
|---------------------------|--------------------|--------------------------------------------------------------------------------------|---|
| Background /<br>rationale | <a href="#">#2</a> | Explain the scientific background and rationale for the investigation being reported | 4 |
| Objectives                | <a href="#">#3</a> | State specific objectives, including any prespecified hypotheses                     | 4 |

## Methods

|                               |                     |                                                                                                                                                                                                                                                                  |   |
|-------------------------------|---------------------|------------------------------------------------------------------------------------------------------------------------------------------------------------------------------------------------------------------------------------------------------------------|---|
| Study design                  | <a href="#">#4</a>  | Present key elements of study design early in the paper                                                                                                                                                                                                          | 5 |
| Setting                       | <a href="#">#5</a>  | Describe the setting, locations, and relevant dates, including periods of recruitment, exposure, follow-up, and data collection                                                                                                                                  | 5 |
| Eligibility criteria          | <a href="#">#6a</a> | Give the eligibility criteria, and the sources and methods of selection of participants.                                                                                                                                                                         | 5 |
|                               | <a href="#">#7</a>  | Clearly define all outcomes, exposures, predictors, potential confounders, and effect modifiers. Give diagnostic criteria, if applicable                                                                                                                         | 6 |
| Data sources /<br>measurement | <a href="#">#8</a>  | For each variable of interest give sources of data and details of methods of assessment (measurement). Describe comparability of assessment methods if there is more than one group. Give information separately for exposed and unexposed groups if applicable. | 6 |
| Bias                          | <a href="#">#9</a>  | Describe any efforts to address potential sources of bias                                                                                                                                                                                                        | 6 |
| Study size                    | <a href="#">#10</a> | Explain how the study size was arrived at                                                                                                                                                                                                                        | 5 |

|    |                  |                      |                                                                   |     |
|----|------------------|----------------------|-------------------------------------------------------------------|-----|
| 1  | Quantitative     | <a href="#">#11</a>  | Explain how quantitative variables were handled in the            | 6   |
| 2  |                  |                      |                                                                   |     |
| 3  | variables        |                      | analyses. If applicable, describe which groupings were chosen,    |     |
| 4  |                  |                      |                                                                   |     |
| 5  |                  |                      | and why                                                           |     |
| 6  |                  |                      |                                                                   |     |
| 7  |                  |                      |                                                                   |     |
| 8  |                  |                      |                                                                   |     |
| 9  | Statistical      | <a href="#">#12a</a> | Describe all statistical methods, including those used to control | 6   |
| 10 |                  |                      |                                                                   |     |
| 11 | methods          |                      | for confounding                                                   |     |
| 12 |                  |                      |                                                                   |     |
| 13 |                  |                      |                                                                   |     |
| 14 | Statistical      | <a href="#">#12b</a> | Describe any methods used to examine subgroups and                | 6   |
| 15 |                  |                      |                                                                   |     |
| 16 | methods          |                      | interactions                                                      |     |
| 17 |                  |                      |                                                                   |     |
| 18 |                  |                      |                                                                   |     |
| 19 | Statistical      | <a href="#">#12c</a> | Explain how missing data were addressed                           | 6   |
| 20 |                  |                      |                                                                   |     |
| 21 | methods          |                      |                                                                   |     |
| 22 |                  |                      |                                                                   |     |
| 23 |                  |                      |                                                                   |     |
| 24 |                  |                      |                                                                   |     |
| 25 | Statistical      | <a href="#">#12d</a> | If applicable, describe analytical methods taking account of      | 6   |
| 26 |                  |                      |                                                                   |     |
| 27 | methods          |                      | sampling strategy                                                 |     |
| 28 |                  |                      |                                                                   |     |
| 29 |                  |                      |                                                                   |     |
| 30 | Statistical      | <a href="#">#12e</a> | Describe any sensitivity analyses                                 | n/a |
| 31 |                  |                      |                                                                   |     |
| 32 | methods          |                      |                                                                   |     |
| 33 |                  |                      |                                                                   |     |
| 34 |                  |                      |                                                                   |     |
| 35 |                  |                      |                                                                   |     |
| 36 | <b>Results</b>   |                      |                                                                   |     |
| 37 |                  |                      |                                                                   |     |
| 38 |                  |                      |                                                                   |     |
| 39 | Participants     | <a href="#">#13a</a> | Report numbers of individuals at each stage of study—eg           | 7   |
| 40 |                  |                      |                                                                   |     |
| 41 |                  |                      | numbers potentially eligible, examined for eligibility, confirmed |     |
| 42 |                  |                      |                                                                   |     |
| 43 |                  |                      | eligible, included in the study, completing follow-up, and        |     |
| 44 |                  |                      |                                                                   |     |
| 45 |                  |                      | analysed. Give information separately for for exposed and         |     |
| 46 |                  |                      |                                                                   |     |
| 47 |                  |                      | unexposed groups if applicable.                                   |     |
| 48 |                  |                      |                                                                   |     |
| 49 |                  |                      |                                                                   |     |
| 50 |                  |                      |                                                                   |     |
| 51 | Participants     | <a href="#">#13b</a> | Give reasons for non-participation at each stage                  | 7   |
| 52 |                  |                      |                                                                   |     |
| 53 |                  |                      |                                                                   |     |
| 54 | Participants     | <a href="#">#13c</a> | Consider use of a flow diagram                                    | n/a |
| 55 |                  |                      |                                                                   |     |
| 56 |                  |                      |                                                                   |     |
| 57 | Descriptive data | <a href="#">#14a</a> | Give characteristics of study participants (eg demographic,       | 7-9 |
| 58 |                  |                      |                                                                   |     |
| 59 |                  |                      |                                                                   |     |
| 60 |                  |                      |                                                                   |     |

clinical, social) and information on exposures and potential confounders. Give information separately for exposed and unexposed groups if applicable.

|    |                   |                      |                                                                                                                                                                                                          |       |
|----|-------------------|----------------------|----------------------------------------------------------------------------------------------------------------------------------------------------------------------------------------------------------|-------|
| 8  | Descriptive data  | <a href="#">#14b</a> | Indicate number of participants with missing data for each variable of interest                                                                                                                          | 8-9   |
| 13 | Outcome data      | <a href="#">#15</a>  | Report numbers of outcome events or summary measures. Give information separately for exposed and unexposed groups if applicable.                                                                        | 8-9   |
| 21 | Main results      | <a href="#">#16a</a> | Give unadjusted estimates and, if applicable, confounder-adjusted estimates and their precision (eg, 95% confidence interval). Make clear which confounders were adjusted for and why they were included | 8-9   |
| 31 | Main results      | <a href="#">#16b</a> | Report category boundaries when continuous variables were categorized                                                                                                                                    | 8-16  |
| 36 | Main results      | <a href="#">#16c</a> | If relevant, consider translating estimates of relative risk into absolute risk for a meaningful time period                                                                                             | n/a   |
| 42 | Other analyses    | <a href="#">#17</a>  | Report other analyses done—e.g., analyses of subgroups and interactions, and sensitivity analyses                                                                                                        | 8-16  |
| 47 | <b>Discussion</b> |                      |                                                                                                                                                                                                          |       |
| 50 | Key results       | <a href="#">#18</a>  | Summarise key results with reference to study objectives                                                                                                                                                 | 18-21 |
| 53 | Limitations       | <a href="#">#19</a>  | Discuss limitations of the study, taking into account sources of potential bias or imprecision. Discuss both direction and magnitude of any potential bias.                                              | 21    |

1 Interpretation [#20](#) Give a cautious overall interpretation considering objectives, 18-12  
2  
3 limitations, multiplicity of analyses, results from similar studies,  
4  
5 and other relevant evidence.  
6  
7

8  
9 Generalisability [#21](#) Discuss the generalisability (external validity) of the study 21  
10  
11 results  
12  
13

## 14 Other Information

15  
16  
17 Funding [#22](#) Give the source of funding and the role of the funders for the 23  
18  
19 present study and, if applicable, for the original study on which  
20  
21 the present article is based  
22  
23  
24

25 None The STROBE checklist is distributed under the terms of the Creative Commons Attribution  
26  
27 License CC-BY. This checklist can be completed online using <https://www.goodreports.org/>, a tool  
28  
29 made by the [EQUATOR Network](#) in collaboration with [Penelope.ai](#)  
30  
31  
32  
33  
34  
35  
36  
37  
38  
39  
40  
41  
42  
43  
44  
45  
46  
47  
48  
49  
50  
51  
52  
53  
54  
55  
56  
57  
58  
59  
60
